# Supplementary material
Source: MDPI journal article supplement (https://www.mdpi.com/1996-1073/7/1/314)
Supplement: s1 [file s1]

<map version="1.0.1">
<!-- To view this file, download free mind mapping software FreeMind from http://freemind.sourceforge.net -->
<node CREATED="1375108050009" ID="ID_382215292" MODIFIED="1375108085111" TEXT="Choosing to use Coal Bed Methane and Oil Products">
<node CREATED="1375108077648" HGAP="-144" ID="ID_1583497822" MODIFIED="1382023834227" POSITION="right" TEXT="Government Perspective" VSHIFT="-93">
<node CREATED="1371222961674" ID="ID_1955046422" MODIFIED="1375119457718" TEXT="Opportunities for First Nations">
<icon BUILTIN="go"/>
<node CREATED="1372420908757" ID="ID_1580706306" MODIFIED="1375114571907" TEXT="Consultations with First Nations and aboriginal involvement">
<node CREATED="1375210117048" ID="ID_497217091" LINK="http://www.energy.alberta.ca/About_Us/1001.asp" MODIFIED="1375210117048" TEXT="energy.alberta.ca &gt; About Us &gt; 1001"/>
<node CREATED="1375210253199" LINK="http://www.aadnc-aandc.gc.ca/eng/1337260341093/1337261832734" MODIFIED="1375210253199" TEXT="aadnc-aandc.gc.ca &gt; Eng &gt; 1337260341093 &gt; 1337261832734"/>
</node>
<node CREATED="1372420933122" ID="ID_350502090" MODIFIED="1372420940991" TEXT="Aboriginal employment">
<node CREATED="1375210006761" ID="ID_1116790858" LINK="http://www.energy.alberta.ca/About_Us/1001.asp" MODIFIED="1375210006761" TEXT="energy.alberta.ca &gt; About Us &gt; 1001"/>
</node>
<node CREATED="1375114597985" ID="ID_1743172307" MODIFIED="1375114610852" TEXT="Sharing royalties and revenueswith First Nations">
<node CREATED="1375210006761" ID="ID_1011454315" LINK="http://www.energy.alberta.ca/About_Us/1001.asp" MODIFIED="1375210006761" TEXT="energy.alberta.ca &gt; About Us &gt; 1001"/>
<node CREATED="1375210397572" LINK="http://www.nrcan.gc.ca/sites/www.nrcan.gc.ca.energy/files/pdf/eneene/sources/offext/pdf/prpcep-eng.pdf" MODIFIED="1375210397572" TEXT="nrcan.gc.ca &gt; Sites &gt; Www.nrcan.gc.ca.energy &gt; Files &gt; Pdf &gt; Eneene &gt; Sources &gt; Offext &gt; Pdf &gt; Prpcep-eng"/>
</node>
</node>
<node CREATED="1375110105805" ID="ID_12921401" MODIFIED="1375110161149" TEXT="Commitment to environmental protection">
<icon BUILTIN="go"/>
<node CREATED="1372882686209" ID="ID_1918690187" MODIFIED="1375123251430" TEXT="Considering the viability of clean energy">
<node CREATED="1375210572522" LINK="http://www.neb-one.gc.ca/clf-nsi/rnrgynfmtn/nrgyrprt/nrgyftr/nrgyftr-eng.html" MODIFIED="1375210572522" TEXT="neb-one.gc.ca &gt; Clf-nsi &gt; Rnrgynfmtn &gt; Nrgyrprt &gt; Nrgyftr &gt; Nrgyftr-eng"/>
</node>
<node CREATED="1375206860464" ID="ID_656424227" MODIFIED="1375206862498" TEXT="Water">
<node CREATED="1375110946286" ID="ID_917707380" MODIFIED="1375210940915" TEXT="Reducing water use in the Athabasca region">
<node CREATED="1375210939495" ID="ID_1510746102" LINK="http://rsc-src.ca/sites/default/files/pdf/RSC_ExP_ExecutiveSummary_ENG_Dec14_10_FINAL_v5.pdf" MODIFIED="1375210939495">
<richcontent TYPE="NODE"><html>
  <head>
    
  </head>
  <body>
    <a href="http://rsc-src.ca/sites/default/files/pdf/RSC_ExP_ExecutiveSummary_ENG_Dec14_10_FINAL_v5.pdf">http://rsc-src.ca/sites/default/files/pdf/RSC_ExP_ExecutiveSummary_ENG_Dec14_10_FINAL_v5.pdf</a>
  </body>
</html></richcontent>
</node>
</node>
<node CREATED="1372878091033" ID="ID_109355033" MODIFIED="1375121948836" TEXT="Maximize water recycling">
<node CREATED="1375210974346" ID="ID_1135962695" LINK="http://rsc-src.ca/sites/default/files/pdf/RSC_ExP_ExecutiveSummary_ENG_Dec14_10_FINAL_v5.pdf" MODIFIED="1375210974346">
<richcontent TYPE="NODE"><html>
  <head>
    
  </head>
  <body>
    <a href="http://rsc-src.ca/sites/default/files/pdf/RSC_ExP_ExecutiveSummary_ENG_Dec14_10_FINAL_v5.pdf">http://rsc-src.ca/sites/default/files/pdf/RSC_ExP_ExecutiveSummary_ENG_Dec14_10_FINAL_v5.pdf</a>
  </body>
</html></richcontent>
</node>
<node CREATED="1375215104633" ID="ID_1276219903" LINK="http://albertacanada.com/business/statistics/oil-sands-quarterly.aspx" MODIFIED="1375215104633" TEXT="albertacanada.com &gt; Business &gt; Statistics &gt; Oil-sands-quarterly"/>
<node CREATED="1375216000882" LINK="http://www.aer.ca/rules-and-regulations/directives/directive-074" MODIFIED="1375216000882" TEXT="aer.ca &gt; Rules-and-regulations &gt; Directives &gt; Directive-074"/>
</node>
<node CREATED="1372878201489" ID="ID_949885563" MODIFIED="1375122017302" TEXT="Minimize water and energy use">
<node CREATED="1375210975124" LINK="http://rsc-src.ca/sites/default/files/pdf/RSC_ExP_ExecutiveSummary_ENG_Dec14_10_FINAL_v5.pdf" MODIFIED="1375210975124">
<richcontent TYPE="NODE"><html>
  <head>
    
  </head>
  <body>
    <a href="http://rsc-src.ca/sites/default/files/pdf/RSC_ExP_ExecutiveSummary_ENG_Dec14_10_FINAL_v5.pdf">http://rsc-src.ca/sites/default/files/pdf/RSC_ExP_ExecutiveSummary_ENG_Dec14_10_FINAL_v5.pdf</a>
  </body>
</html></richcontent>
</node>
<node CREATED="1375215104633" ID="ID_751928429" LINK="http://albertacanada.com/business/statistics/oil-sands-quarterly.aspx" MODIFIED="1375215104633" TEXT="albertacanada.com &gt; Business &gt; Statistics &gt; Oil-sands-quarterly"/>
</node>
</node>
<node CREATED="1375206863040" ID="ID_661325186" MODIFIED="1375206865766" TEXT="Environment">
<node CREATED="1372872822493" ID="ID_780994584" MODIFIED="1375211923493" TEXT="Avoid environmental damage">
<node CREATED="1375212371516" ID="ID_472883832" LINK="http://www.neb-one.gc.ca/clf-nsi/rpblctn/rprt/nnlrprt/nnlrprt-eng.html" MODIFIED="1375212371516" TEXT="neb-one.gc.ca &gt; Clf-nsi &gt; Rpblctn &gt; Rprt &gt; Nnlrprt &gt; Nnlrprt-eng"/>
<node CREATED="1375210117048" ID="ID_1652125848" LINK="http://www.energy.alberta.ca/About_Us/1001.asp" MODIFIED="1375210117048" TEXT="energy.alberta.ca &gt; About Us &gt; 1001"/>
</node>
<node CREATED="1372875309195" ID="ID_791586609" MODIFIED="1372875317119" TEXT="Protect the environment">
<node CREATED="1375211944637" LINK="http://www.nrcan.gc.ca/sites/www.nrcan.gc.ca.energy/files/pdf/eneene/sources/offext/pdf/prpcep-eng.pdf" MODIFIED="1375211944637" TEXT="nrcan.gc.ca &gt; Sites &gt; Www.nrcan.gc.ca.energy &gt; Files &gt; Pdf &gt; Eneene &gt; Sources &gt; Offext &gt; Pdf &gt; Prpcep-eng"/>
<node CREATED="1375212372812" LINK="http://www.neb-one.gc.ca/clf-nsi/rpblctn/rprt/nnlrprt/nnlrprt-eng.html" MODIFIED="1375212372812" TEXT="neb-one.gc.ca &gt; Clf-nsi &gt; Rpblctn &gt; Rprt &gt; Nnlrprt &gt; Nnlrprt-eng"/>
</node>
<node CREATED="1375119526900" ID="ID_1989425763" MODIFIED="1375119537095" TEXT="Acceptable environmental damage">
<node CREATED="1375210117048" ID="ID_298250185" LINK="http://www.energy.alberta.ca/About_Us/1001.asp" MODIFIED="1375210117048" TEXT="energy.alberta.ca &gt; About Us &gt; 1001"/>
</node>
<node CREATED="1372877287033" ID="ID_275589724" MODIFIED="1375121870846" TEXT="Monitoring ecosystem health impacts">
<node CREATED="1375212376009" LINK="http://www.neb-one.gc.ca/clf-nsi/rpblctn/rprt/nnlrprt/nnlrprt-eng.html" MODIFIED="1375212376009" TEXT="neb-one.gc.ca &gt; Clf-nsi &gt; Rpblctn &gt; Rprt &gt; Nnlrprt &gt; Nnlrprt-eng"/>
<node CREATED="1375210117048" ID="ID_1314672689" LINK="http://www.energy.alberta.ca/About_Us/1001.asp" MODIFIED="1375210117048" TEXT="energy.alberta.ca &gt; About Us &gt; 1001"/>
</node>
<node CREATED="1372878205759" ID="ID_380082702" MODIFIED="1375122023863" TEXT="Minimize environmental impacts">
<node CREATED="1375212377064" LINK="http://www.neb-one.gc.ca/clf-nsi/rpblctn/rprt/nnlrprt/nnlrprt-eng.html" MODIFIED="1375212377064" TEXT="neb-one.gc.ca &gt; Clf-nsi &gt; Rpblctn &gt; Rprt &gt; Nnlrprt &gt; Nnlrprt-eng"/>
<node CREATED="1375210117048" ID="ID_1264134443" LINK="http://www.energy.alberta.ca/About_Us/1001.asp" MODIFIED="1375210117048" TEXT="energy.alberta.ca &gt; About Us &gt; 1001"/>
</node>
<node CREATED="1372869709812" ID="ID_540362122" MODIFIED="1375122359007" TEXT="Preserve long term health of ecosystems">
<node CREATED="1375212386353" ID="ID_1869044933" LINK="http://www.neb-one.gc.ca/clf-nsi/rpblctn/rprt/nnlrprt/nnlrprt-eng.html" MODIFIED="1375212386353" TEXT="neb-one.gc.ca &gt; Clf-nsi &gt; Rpblctn &gt; Rprt &gt; Nnlrprt &gt; Nnlrprt-eng"/>
</node>
</node>
<node CREATED="1375206866116" ID="ID_284179507" MODIFIED="1375206867749" TEXT="Waste">
<node CREATED="1375119500488" ID="ID_571355244" MODIFIED="1375119524031" TEXT="Acceptable methods for disposing of drill cuttings ">
<node CREATED="1375213296209" ID="ID_805301247" LINK="http://www.oag-bvg.gc.ca/internet/English/parl_cesd_201212_e_37708.html" MODIFIED="1375213296209" TEXT="oag-bvg.gc.ca &gt; Internet &gt; English &gt; Parl cesd 201212 e 37708"/>
</node>
<node CREATED="1372883109709" ID="ID_1613834953" MODIFIED="1375124029830" TEXT="Waste management">
<node CREATED="1375210117048" ID="ID_934000275" LINK="http://www.energy.alberta.ca/About_Us/1001.asp" MODIFIED="1375210117048" TEXT="energy.alberta.ca &gt; About Us &gt; 1001"/>
<node CREATED="1375212386353" ID="ID_441934290" LINK="http://www.neb-one.gc.ca/clf-nsi/rpblctn/rprt/nnlrprt/nnlrprt-eng.html" MODIFIED="1375212386353" TEXT="neb-one.gc.ca &gt; Clf-nsi &gt; Rpblctn &gt; Rprt &gt; Nnlrprt &gt; Nnlrprt-eng"/>
</node>
</node>
<node CREATED="1375206890841" ID="ID_436377722" MODIFIED="1375206892067" TEXT="Air">
<node CREATED="1375110961410" ID="ID_164766225" MODIFIED="1375110975902" TEXT="Assess, manage and improve air quality">
<node CREATED="1375215104633" ID="ID_1071032322" LINK="http://albertacanada.com/business/statistics/oil-sands-quarterly.aspx" MODIFIED="1375215104633" TEXT="albertacanada.com &gt; Business &gt; Statistics &gt; Oil-sands-quarterly"/>
</node>
</node>
</node>
<node CREATED="1375121305792" ID="ID_1544919158" MODIFIED="1375121514442" TEXT="Ensuring the interests of Albertans and Canadians are being met">
<icon BUILTIN="go"/>
<node CREATED="1372874905214" ID="ID_1431717279" MODIFIED="1372874947822" TEXT="Surveying Albertans knowledge on the positive impact oil and gas industry has on the economy">
<node CREATED="1375213296209" ID="ID_752615757" LINK="http://www.oag-bvg.gc.ca/internet/English/parl_cesd_201212_e_37708.html" MODIFIED="1375213296209" TEXT="oag-bvg.gc.ca &gt; Internet &gt; English &gt; Parl cesd 201212 e 37708"/>
</node>
<node CREATED="1372874962004" ID="ID_428034300" MODIFIED="1372874980142" TEXT="Providing information for Albertans on the positive impact oil and gas industry has on the economy">
<node CREATED="1375213296209" ID="ID_562454979" LINK="http://www.oag-bvg.gc.ca/internet/English/parl_cesd_201212_e_37708.html" MODIFIED="1375213296209" TEXT="oag-bvg.gc.ca &gt; Internet &gt; English &gt; Parl cesd 201212 e 37708"/>
</node>
<node CREATED="1372878672893" ID="ID_1541500127" MODIFIED="1372878680897" TEXT="Address needs of Aboriginals">
<node CREATED="1375210117048" ID="ID_683789587" LINK="http://www.energy.alberta.ca/About_Us/1001.asp" MODIFIED="1375210117048" TEXT="energy.alberta.ca &gt; About Us &gt; 1001"/>
<node CREATED="1375212386353" ID="ID_551014942" LINK="http://www.neb-one.gc.ca/clf-nsi/rpblctn/rprt/nnlrprt/nnlrprt-eng.html" MODIFIED="1375212386353" TEXT="neb-one.gc.ca &gt; Clf-nsi &gt; Rpblctn &gt; Rprt &gt; Nnlrprt &gt; Nnlrprt-eng"/>
</node>
<node CREATED="1372878067512" ID="ID_1273804520" MODIFIED="1375121617774" TEXT="Maximize benefits to Albertans">
<node CREATED="1375210117048" ID="ID_969585809" LINK="http://www.energy.alberta.ca/About_Us/1001.asp" MODIFIED="1375210117048" TEXT="energy.alberta.ca &gt; About Us &gt; 1001"/>
</node>
<node CREATED="1372878077506" ID="ID_1642028455" MODIFIED="1375121624547" TEXT="Maximize economic benefits to Canadians">
<node CREATED="1375212386353" ID="ID_38408807" LINK="http://www.neb-one.gc.ca/clf-nsi/rpblctn/rprt/nnlrprt/nnlrprt-eng.html" MODIFIED="1375212386353" TEXT="neb-one.gc.ca &gt; Clf-nsi &gt; Rpblctn &gt; Rprt &gt; Nnlrprt &gt; Nnlrprt-eng"/>
</node>
<node CREATED="1372877287033" ID="ID_846879711" MODIFIED="1375121874476" TEXT="Monitoring human health impacts">
<node CREATED="1375210117048" ID="ID_1517277678" LINK="http://www.energy.alberta.ca/About_Us/1001.asp" MODIFIED="1375210117048" TEXT="energy.alberta.ca &gt; About Us &gt; 1001"/>
<node CREATED="1375212386353" ID="ID_1186285046" LINK="http://www.neb-one.gc.ca/clf-nsi/rpblctn/rprt/nnlrprt/nnlrprt-eng.html" MODIFIED="1375212386353" TEXT="neb-one.gc.ca &gt; Clf-nsi &gt; Rpblctn &gt; Rprt &gt; Nnlrprt &gt; Nnlrprt-eng"/>
</node>
<node CREATED="1372878571884" ID="ID_485516299" MODIFIED="1375122284452" TEXT="Need for public understanding and support">
<node CREATED="1375210117048" ID="ID_326462328" LINK="http://www.energy.alberta.ca/About_Us/1001.asp" MODIFIED="1375210117048" TEXT="energy.alberta.ca &gt; About Us &gt; 1001"/>
<node CREATED="1375220928523" ID="ID_774185503" LINK="http://www.energy.alberta.ca/About_Us/1000.asp" MODIFIED="1375220928523" TEXT="energy.alberta.ca &gt; About Us &gt; 1000"/>
<node CREATED="1375212386353" ID="ID_1386147088" LINK="http://www.neb-one.gc.ca/clf-nsi/rpblctn/rprt/nnlrprt/nnlrprt-eng.html" MODIFIED="1375212386353" TEXT="neb-one.gc.ca &gt; Clf-nsi &gt; Rpblctn &gt; Rprt &gt; Nnlrprt &gt; Nnlrprt-eng"/>
</node>
<node CREATED="1372878628791" ID="ID_1272580100" MODIFIED="1375122334672" TEXT="Need for stakeholder engagement/ Preference for stakeholder collaboration">
<node CREATED="1375217067298" ID="ID_1362913620" LINK="http://www.neb-one.gc.ca/clf-nsi/rnrgynfmtn/nrgyrprt/nrgyftr/nrgyftr-eng.html" MODIFIED="1375217067298" TEXT="neb-one.gc.ca &gt; Clf-nsi &gt; Rnrgynfmtn &gt; Nrgyrprt &gt; Nrgyftr &gt; Nrgyftr-eng"/>
</node>
<node CREATED="1372882615423" ID="ID_226347721" MODIFIED="1372882623266" TEXT="Value creation">
<node CREATED="1375215104633" ID="ID_821680826" LINK="http://albertacanada.com/business/statistics/oil-sands-quarterly.aspx" MODIFIED="1375215104633" TEXT="albertacanada.com &gt; Business &gt; Statistics &gt; Oil-sands-quarterly"/>
</node>
<node CREATED="1372882623576" ID="ID_615284001" MODIFIED="1375123414039" TEXT="Value for the people">
<node CREATED="1375210117048" ID="ID_692933097" LINK="http://www.energy.alberta.ca/About_Us/1001.asp" MODIFIED="1375210117048" TEXT="energy.alberta.ca &gt; About Us &gt; 1001"/>
<node CREATED="1375453012113" ID="ID_159638052" LINK="http://www.energy.alberta.ca/OilSands/1189.asp" MODIFIED="1375453012113" TEXT="energy.alberta.ca &gt; OilSands &gt; 1189"/>
</node>
</node>
<node CREATED="1375121632850" ID="ID_1117290824" MODIFIED="1375121658256" TEXT="Government involvement in production">
<node CREATED="1375121670144" ID="ID_1176392035" MODIFIED="1375121687234" TEXT="Enhancing and encouraging growth">
<icon BUILTIN="go"/>
<node CREATED="1375121690911" ID="ID_83143386" MODIFIED="1375121700447" TEXT="Maximize resource recovery ">
<node CREATED="1375219875543" LINK="http://www.aer.ca/data-and-publications/publications/reports" MODIFIED="1375219875543" TEXT="aer.ca &gt; Data-and-publications &gt; Publications &gt; Reports"/>
</node>
<node CREATED="1375121960818" ID="ID_1032865177" MODIFIED="1375121969378" TEXT="Maximize production">
<node CREATED="1375219817316" LINK="http://www.aadnc-aandc.gc.ca/eng/1337260341093/1337261832734" MODIFIED="1375219817316" TEXT="aadnc-aandc.gc.ca &gt; Eng &gt; 1337260341093 &gt; 1337261832734"/>
</node>
<node CREATED="1372878347062" ID="ID_161420554" MODIFIED="1375122181984" TEXT="Need for additional capacity">
<node CREATED="1375215104633" ID="ID_1487735508" LINK="http://albertacanada.com/business/statistics/oil-sands-quarterly.aspx" MODIFIED="1375215104633" TEXT="albertacanada.com &gt; Business &gt; Statistics &gt; Oil-sands-quarterly"/>
<node CREATED="1375212386353" ID="ID_636688731" LINK="http://www.neb-one.gc.ca/clf-nsi/rpblctn/rprt/nnlrprt/nnlrprt-eng.html" MODIFIED="1375212386353" TEXT="neb-one.gc.ca &gt; Clf-nsi &gt; Rpblctn &gt; Rprt &gt; Nnlrprt &gt; Nnlrprt-eng"/>
</node>
<node CREATED="1372878539343" ID="ID_755375429" MODIFIED="1375122193199" TEXT="Need to stimulate exploration">
<node CREATED="1375220059013" LINK="http://www.energy.alberta.ca/Tenure/pdfs/tenure_brochure.pdf" MODIFIED="1375220059013" TEXT="energy.alberta.ca &gt; Tenure &gt; Pdfs &gt; Tenure brochure"/>
<node CREATED="1375222882556" LINK="http://www.energy.alberta.ca/OilSands/1189.asp" MODIFIED="1375222882556" TEXT="energy.alberta.ca &gt; OilSands &gt; 1189"/>
</node>
</node>
<node CREATED="1375119599574" ID="ID_95740515" MODIFIED="1375119660550" TEXT="Commitment to controlling and regulating activity">
<icon BUILTIN="go"/>
<node CREATED="1372872795146" ID="ID_324051165" MODIFIED="1375452759067" TEXT="Avoid problems during extraction and production">
<node CREATED="1375452721197" LINK="http://bluegreencanada.ca/sites/default/files/resources/More%20Bang%20for%20Buck%20Nov%202012%20FINAL%20WEB.pdf" MODIFIED="1375452721197">
<richcontent TYPE="NODE"><html>
  <head>
    
  </head>
  <body>
    <a href="http://bluegreencanada.ca/sites/default/files/resources/More%20Bang%20for%20Buck%20Nov%202012%20FINAL%20WEB.pdf">http://bluegreencanada.ca/sites/default/files/resources/More%20Bang%20for%20Buck%20Nov%202012%20FINAL%20WEB.pdf</a>
  </body>
</html></richcontent>
</node>
<node CREATED="1375452759544" LINK="http://www.energy.alberta.ca/OilSands/1189.asp" MODIFIED="1375452759544" TEXT="energy.alberta.ca &gt; OilSands &gt; 1189"/>
</node>
<node CREATED="1375119904439" ID="ID_1014546545" MODIFIED="1375119921006" TEXT="Quality control">
<node CREATED="1375453115456" LINK="http://www.ai-ees.ca/media/6860/1919_corrosivity_of_dilbit_vs_conventional_crude-nov28-11_rev1.pdf" MODIFIED="1375453115456" TEXT="ai-ees.ca &gt; Media &gt; 6860 &gt; 1919 corrosivity of dilbit vs conventional crude-nov28-11 rev1"/>
</node>
<node CREATED="1375119948373" ID="ID_1141388825" MODIFIED="1375453847394" TEXT="Control over wells and production">
<node CREATED="1375453758232" ID="ID_595849630" LINK="http://www.aer.ca/data-and-publications/publications/reports" MODIFIED="1375453758232" TEXT="aer.ca &gt; Data-and-publications &gt; Publications &gt; Reports"/>
</node>
<node CREATED="1375119960668" ID="ID_1452002097" MODIFIED="1375119977510" TEXT="Internal control">
<node CREATED="1375453014467" ID="ID_1642312762" LINK="http://www.energy.alberta.ca/OilSands/1189.asp" MODIFIED="1375453014467" TEXT="energy.alberta.ca &gt; OilSands &gt; 1189"/>
<node CREATED="1375453564023" ID="ID_1151364834" LINK="http://www.cdnoilsands.com/files/FinancialReports/AnnualReport2012/2012AnnualReport.pdf" MODIFIED="1375453564023" TEXT="cdnoilsands.com &gt; Files &gt; FinancialReports &gt; AnnualReport2012 &gt; 2012AnnualReport"/>
<node CREATED="1375212386353" ID="ID_483960387" LINK="http://www.neb-one.gc.ca/clf-nsi/rpblctn/rprt/nnlrprt/nnlrprt-eng.html" MODIFIED="1375212386353" TEXT="neb-one.gc.ca &gt; Clf-nsi &gt; Rpblctn &gt; Rprt &gt; Nnlrprt &gt; Nnlrprt-eng"/>
</node>
<node CREATED="1375119977898" ID="ID_9460517" MODIFIED="1375119984496" TEXT="Controlling costs">
<node CREATED="1375454138372" LINK="http://www.aer.ca/data-and-publications/publications/reports" MODIFIED="1375454138372" TEXT="aer.ca &gt; Data-and-publications &gt; Publications &gt; Reports"/>
<node CREATED="1375454173260" LINK="http://www.energy.alberta.ca/OilSands/1189.asp" MODIFIED="1375454173260" TEXT="energy.alberta.ca &gt; OilSands &gt; 1189"/>
</node>
<node CREATED="1375120161141" ID="ID_90524830" MODIFIED="1375120173787" TEXT="Develop plans and regulatory processes">
<node CREATED="1375215104633" ID="ID_666823038" LINK="http://albertacanada.com/business/statistics/oil-sands-quarterly.aspx" MODIFIED="1375215104633" TEXT="albertacanada.com &gt; Business &gt; Statistics &gt; Oil-sands-quarterly"/>
<node CREATED="1375210117048" ID="ID_1919823711" LINK="http://www.energy.alberta.ca/About_Us/1001.asp" MODIFIED="1375210117048" TEXT="energy.alberta.ca &gt; About Us &gt; 1001"/>
<node CREATED="1375223555408" LINK="http://www.energy.alberta.ca/About_Us/1000.asp" MODIFIED="1375223555408">
<richcontent TYPE="NODE"><html>
  <head>
    
  </head>
  <body>
    <a href="http://www.energy.alberta.ca/About_Us/1000.asp">http://www.energy.alberta.ca/About_Us/1000.asp</a>
  </body>
</html></richcontent>
</node>
<node CREATED="1375223817324" LINK="http://www.aadnc-aandc.gc.ca/eng/1337260341093/1337261832734" MODIFIED="1375223817324" TEXT="aadnc-aandc.gc.ca &gt; Eng &gt; 1337260341093 &gt; 1337261832734"/>
<node CREATED="1375223894296" LINK="http://www.aer.ca/data-and-publications/publications/reports" MODIFIED="1375223894296" TEXT="aer.ca &gt; Data-and-publications &gt; Publications &gt; Reports"/>
</node>
<node CREATED="1375120207503" ID="ID_949681137" MODIFIED="1375120214013" TEXT="Develop policies">
<node CREATED="1375210117048" ID="ID_858778096" LINK="http://www.energy.alberta.ca/About_Us/1001.asp" MODIFIED="1375210117048" TEXT="energy.alberta.ca &gt; About Us &gt; 1001"/>
<node CREATED="1375223819482" LINK="http://www.aadnc-aandc.gc.ca/eng/1337260341093/1337261832734" MODIFIED="1375223819482" TEXT="aadnc-aandc.gc.ca &gt; Eng &gt; 1337260341093 &gt; 1337261832734"/>
<node CREATED="1375212371516" ID="ID_387980708" LINK="http://www.neb-one.gc.ca/clf-nsi/rpblctn/rprt/nnlrprt/nnlrprt-eng.html" MODIFIED="1375212371516" TEXT="neb-one.gc.ca &gt; Clf-nsi &gt; Rpblctn &gt; Rprt &gt; Nnlrprt &gt; Nnlrprt-eng"/>
</node>
<node CREATED="1375120234908" ID="ID_1860370636" MODIFIED="1375120260666" TEXT="Develop measures and standards">
<node CREATED="1375210117048" ID="ID_325199136" LINK="http://www.energy.alberta.ca/About_Us/1001.asp" MODIFIED="1375210117048" TEXT="energy.alberta.ca &gt; About Us &gt; 1001"/>
<node CREATED="1375212371516" ID="ID_481330552" LINK="http://www.neb-one.gc.ca/clf-nsi/rpblctn/rprt/nnlrprt/nnlrprt-eng.html" MODIFIED="1375212371516" TEXT="neb-one.gc.ca &gt; Clf-nsi &gt; Rpblctn &gt; Rprt &gt; Nnlrprt &gt; Nnlrprt-eng"/>
</node>
<node CREATED="1372878549277" ID="ID_1808748108" MODIFIED="1375122224380" TEXT="Need for leadership">
<node CREATED="1375220763610" ID="ID_379692987" LINK="http://www.energy.alberta.ca/Org/pdfs/Valentine_ABRoyalty.pdf" MODIFIED="1375220763610" TEXT="energy.alberta.ca &gt; Org &gt; Pdfs &gt; Valentine ABRoyalty"/>
<node CREATED="1375210939495" ID="ID_518680692" LINK="http://rsc-src.ca/sites/default/files/pdf/RSC_ExP_ExecutiveSummary_ENG_Dec14_10_FINAL_v5.pdf" MODIFIED="1375210939495">
<richcontent TYPE="NODE"><html>
  <head>
    
  </head>
  <body>
    <a href="http://rsc-src.ca/sites/default/files/pdf/RSC_ExP_ExecutiveSummary_ENG_Dec14_10_FINAL_v5.pdf">http://rsc-src.ca/sites/default/files/pdf/RSC_ExP_ExecutiveSummary_ENG_Dec14_10_FINAL_v5.pdf</a>
  </body>
</html></richcontent>
</node>
</node>
<node CREATED="1372878563338" ID="ID_1433669206" MODIFIED="1375122228302" TEXT="Need for clearly defined roles">
<node CREATED="1375220766503" ID="ID_880797414" LINK="http://www.energy.alberta.ca/Org/pdfs/Valentine_ABRoyalty.pdf" MODIFIED="1375220766503" TEXT="energy.alberta.ca &gt; Org &gt; Pdfs &gt; Valentine ABRoyalty"/>
<node CREATED="1375210939495" ID="ID_1235579622" LINK="http://rsc-src.ca/sites/default/files/pdf/RSC_ExP_ExecutiveSummary_ENG_Dec14_10_FINAL_v5.pdf" MODIFIED="1375210939495">
<richcontent TYPE="NODE"><html>
  <head>
    
  </head>
  <body>
    <a href="http://rsc-src.ca/sites/default/files/pdf/RSC_ExP_ExecutiveSummary_ENG_Dec14_10_FINAL_v5.pdf">http://rsc-src.ca/sites/default/files/pdf/RSC_ExP_ExecutiveSummary_ENG_Dec14_10_FINAL_v5.pdf</a>
  </body>
</html></richcontent>
</node>
</node>
<node CREATED="1372879215216" ID="ID_489615789" MODIFIED="1375122439538" TEXT="Reporting performance">
<node CREATED="1375454777181" ID="ID_1594959423" LINK="http://albertacanada.com/business/statistics/oil-sands-quarterly.aspx" MODIFIED="1375454777181" TEXT="albertacanada.com &gt; Business &gt; Statistics &gt; Oil-sands-quarterly"/>
<node CREATED="1375210117048" ID="ID_1781825079" LINK="http://www.energy.alberta.ca/About_Us/1001.asp" MODIFIED="1375210117048" TEXT="energy.alberta.ca &gt; About Us &gt; 1001"/>
</node>
<node CREATED="1372879402003" ID="ID_1741986251" MODIFIED="1375122451122" TEXT="Performance measures">
<node CREATED="1375210117048" ID="ID_1242190315" LINK="http://www.energy.alberta.ca/About_Us/1001.asp" MODIFIED="1375210117048" TEXT="energy.alberta.ca &gt; About Us &gt; 1001"/>
</node>
<node CREATED="1372879405420" ID="ID_1671231455" MODIFIED="1375122458050" TEXT="Performance indicators">
<node CREATED="1375454818649" ID="ID_1615661741" LINK="http://albertacanada.com/business/statistics/oil-sands-quarterly.aspx" MODIFIED="1375454818649" TEXT="albertacanada.com &gt; Business &gt; Statistics &gt; Oil-sands-quarterly"/>
</node>
<node CREATED="1372879802266" ID="ID_1322922718" MODIFIED="1375123131914" TEXT=" Quality data and information">
<node CREATED="1375210117048" ID="ID_613412919" LINK="http://www.energy.alberta.ca/About_Us/1001.asp" MODIFIED="1375210117048" TEXT="energy.alberta.ca &gt; About Us &gt; 1001"/>
<node CREATED="1375455762376" ID="ID_1398767869" LINK="http://www.energy.alberta.ca/Oil/pdfs/Report_ZiffEnergyDrillingOptimization.pdf" MODIFIED="1375455762376" TEXT="energy.alberta.ca &gt; Oil &gt; Pdfs &gt; Report ZiffEnergyDrillingOptimization"/>
<node CREATED="1375212371516" ID="ID_814831544" LINK="http://www.neb-one.gc.ca/clf-nsi/rpblctn/rprt/nnlrprt/nnlrprt-eng.html" MODIFIED="1375212371516" TEXT="neb-one.gc.ca &gt; Clf-nsi &gt; Rpblctn &gt; Rprt &gt; Nnlrprt &gt; Nnlrprt-eng"/>
</node>
<node CREATED="1372879807140" ID="ID_1007203407" MODIFIED="1375123137485" TEXT="Quality management">
<node CREATED="1375212371516" ID="ID_1036100114" LINK="http://www.neb-one.gc.ca/clf-nsi/rpblctn/rprt/nnlrprt/nnlrprt-eng.html" MODIFIED="1375212371516" TEXT="neb-one.gc.ca &gt; Clf-nsi &gt; Rpblctn &gt; Rprt &gt; Nnlrprt &gt; Nnlrprt-eng"/>
</node>
<node CREATED="1375123184301" ID="ID_71797381" MODIFIED="1375123187146" TEXT="Risk management">
<node CREATED="1375210117048" ID="ID_246295437" LINK="http://www.energy.alberta.ca/About_Us/1001.asp" MODIFIED="1375210117048" TEXT="energy.alberta.ca &gt; About Us &gt; 1001"/>
<node CREATED="1375456954162" LINK="http://www.oag-bvg.gc.ca/internet/English/parl_cesd_201212_e_37708.html" MODIFIED="1375456954162">
<richcontent TYPE="NODE"><html>
  <head>
    
  </head>
  <body>
    <a href="http://www.oag-bvg.gc.ca/internet/English/parl_cesd_201212_e_37708.html">http://www.oag-bvg.gc.ca/internet/English/parl_cesd_201212_e_37708.html</a>
  </body>
</html></richcontent>
</node>
<node CREATED="1375457101499" LINK="http://www.cdnoilsands.com/files/FinancialReports/AnnualReport2012/2012AnnualReport.pdf" MODIFIED="1375457101499" TEXT="cdnoilsands.com &gt; Files &gt; FinancialReports &gt; AnnualReport2012 &gt; 2012AnnualReport"/>
<node CREATED="1375212371516" ID="ID_1185915691" LINK="http://www.neb-one.gc.ca/clf-nsi/rpblctn/rprt/nnlrprt/nnlrprt-eng.html" MODIFIED="1375212371516" TEXT="neb-one.gc.ca &gt; Clf-nsi &gt; Rpblctn &gt; Rprt &gt; Nnlrprt &gt; Nnlrprt-eng"/>
</node>
</node>
</node>
<node CREATED="1375119746150" ID="ID_987590450" MODIFIED="1375207399474" TEXT="Job Production">
<icon BUILTIN="go"/>
<node CREATED="1372877108565" ID="ID_1607857761" MODIFIED="1375121925778" TEXT="Ensuring occupational health and safety">
<node CREATED="1375212371516" ID="ID_887639714" LINK="http://www.neb-one.gc.ca/clf-nsi/rpblctn/rprt/nnlrprt/nnlrprt-eng.html" MODIFIED="1375212371516" TEXT="neb-one.gc.ca &gt; Clf-nsi &gt; Rpblctn &gt; Rprt &gt; Nnlrprt &gt; Nnlrprt-eng"/>
<node CREATED="1375210117048" ID="ID_1885550744" LINK="http://www.energy.alberta.ca/About_Us/1001.asp" MODIFIED="1375210117048" TEXT="energy.alberta.ca &gt; About Us &gt; 1001"/>
</node>
<node CREATED="1375123041959" ID="ID_119747053" MODIFIED="1375123053182" TEXT="Ensuring quality work environment">
<node CREATED="1375212371516" ID="ID_352192194" LINK="http://www.neb-one.gc.ca/clf-nsi/rpblctn/rprt/nnlrprt/nnlrprt-eng.html" MODIFIED="1375212371516" TEXT="neb-one.gc.ca &gt; Clf-nsi &gt; Rpblctn &gt; Rprt &gt; Nnlrprt &gt; Nnlrprt-eng"/>
<node CREATED="1375210117048" ID="ID_773011507" LINK="http://www.energy.alberta.ca/About_Us/1001.asp" MODIFIED="1375210117048" TEXT="energy.alberta.ca &gt; About Us &gt; 1001"/>
</node>
</node>
<node CREATED="1375119750722" ID="ID_983648995" MODIFIED="1375207398978" TEXT="Wealth Creation">
<icon BUILTIN="go"/>
<node CREATED="1372872947818" ID="ID_1890295734" MODIFIED="1375457805911" TEXT="cost">
<node CREATED="1375212371516" ID="ID_462393339" LINK="http://www.neb-one.gc.ca/clf-nsi/rpblctn/rprt/nnlrprt/nnlrprt-eng.html" MODIFIED="1375212371516" TEXT="neb-one.gc.ca &gt; Clf-nsi &gt; Rpblctn &gt; Rprt &gt; Nnlrprt &gt; Nnlrprt-eng"/>
<node CREATED="1375210117048" ID="ID_751422541" LINK="http://www.energy.alberta.ca/About_Us/1001.asp" MODIFIED="1375210117048" TEXT="energy.alberta.ca &gt; About Us &gt; 1001"/>
</node>
<node CREATED="1375120052588" ID="ID_1706203852" MODIFIED="1375120066542" TEXT="Cost effective production">
<node CREATED="1375457881440" LINK="http://www.conferenceboard.ca/e-library/abstract.aspx?did=5148" MODIFIED="1375457881440" TEXT="conferenceboard.ca &gt; E-library &gt; Abstract ? ..."/>
<node CREATED="1375454777181" ID="ID_1095271590" LINK="http://albertacanada.com/business/statistics/oil-sands-quarterly.aspx" MODIFIED="1375454777181" TEXT="albertacanada.com &gt; Business &gt; Statistics &gt; Oil-sands-quarterly"/>
</node>
<node CREATED="1375123272881" ID="ID_706060700" MODIFIED="1375459647939" TEXT="Considering the economic viability">
<node CREATED="1375459107434" ID="ID_1606751027" LINK="http://www.energy.alberta.ca/OilSands/1189.asp" MODIFIED="1375459107434" TEXT="energy.alberta.ca &gt; OilSands &gt; 1189"/>
<node CREATED="1375459592364" LINK="http://www.pgic-iogc.gc.ca/eng/1100110010469/1100110010470" MODIFIED="1375459592364" TEXT="pgic-iogc.gc.ca &gt; Eng &gt; 1100110010469 &gt; 1100110010470"/>
<node CREATED="1375459648714" LINK="http://www.nrcan.gc.ca/sites/www.nrcan.gc.ca.energy/files/pdf/eneene/sources/offext/pdf/prpcep-eng.pdf" MODIFIED="1375459648714" TEXT="nrcan.gc.ca &gt; Sites &gt; Www.nrcan.gc.ca.energy &gt; Files &gt; Pdf &gt; Eneene &gt; Sources &gt; Offext &gt; Pdf &gt; Prpcep-eng"/>
</node>
<node CREATED="1372882634386" ID="ID_1017406111" MODIFIED="1375123378027" TEXT="Value of products and exports">
<node CREATED="1375210117048" ID="ID_1890833878" LINK="http://www.energy.alberta.ca/About_Us/1001.asp" MODIFIED="1375210117048" TEXT="energy.alberta.ca &gt; About Us &gt; 1001"/>
</node>
<node CREATED="1372882605328" ID="ID_40605028" MODIFIED="1372882614870" TEXT="Value-added, value processing">
<node CREATED="1375215104633" ID="ID_1648635457" LINK="http://albertacanada.com/business/statistics/oil-sands-quarterly.aspx" MODIFIED="1375215104633" TEXT="albertacanada.com &gt; Business &gt; Statistics &gt; Oil-sands-quarterly"/>
<node CREATED="1375210117048" ID="ID_1458326551" LINK="http://www.energy.alberta.ca/About_Us/1001.asp" MODIFIED="1375210117048" TEXT="energy.alberta.ca &gt; About Us &gt; 1001"/>
</node>
</node>
<node CREATED="1375119755880" ID="ID_1439190864" MODIFIED="1375119810750" TEXT="Economic and Monetary Benefits">
<icon BUILTIN="go"/>
<node CREATED="1372873028992" ID="ID_692803482" MODIFIED="1372887752181" TEXT="For Albertans">
<node CREATED="1375210117048" ID="ID_1690087834" LINK="http://www.energy.alberta.ca/About_Us/1001.asp" MODIFIED="1375210117048" TEXT="energy.alberta.ca &gt; About Us &gt; 1001"/>
</node>
<node CREATED="1372873065235" ID="ID_514959774" MODIFIED="1372873076510" TEXT="For Canadians">
<node CREATED="1375212386353" ID="ID_1529033620" LINK="http://www.neb-one.gc.ca/clf-nsi/rpblctn/rprt/nnlrprt/nnlrprt-eng.html" MODIFIED="1375212386353" TEXT="neb-one.gc.ca &gt; Clf-nsi &gt; Rpblctn &gt; Rprt &gt; Nnlrprt &gt; Nnlrprt-eng"/>
</node>
<node CREATED="1372874873606" ID="ID_1692489570" MODIFIED="1372874893989" TEXT="Positive impact of Alberta&apos;s energy sector on the economy">
<node CREATED="1375210117048" ID="ID_1336177354" LINK="http://www.energy.alberta.ca/About_Us/1001.asp" MODIFIED="1375210117048" TEXT="energy.alberta.ca &gt; About Us &gt; 1001"/>
</node>
<node CREATED="1372874980568" ID="ID_1810793511" MODIFIED="1372874999552" TEXT="Diversify and strengthen the Northern economy">
<node CREATED="1375465860876" LINK="http://www.cnrl.com/investor-information/financial-information/financial-reports/annual-report.html" MODIFIED="1375465860876" TEXT="cnrl.com &gt; Investor-information &gt; Financial-information &gt; Financial-reports &gt; Annual-report"/>
</node>
</node>
<node CREATED="1375112193250" ID="ID_1398356235" MODIFIED="1375207447883" TEXT="Monetary Costs">
<icon BUILTIN="stop"/>
<node CREATED="1372873689115" ID="ID_828483459" MODIFIED="1375120091041" TEXT="Pension costs">
<node CREATED="1375212371516" ID="ID_77422636" LINK="http://www.neb-one.gc.ca/clf-nsi/rpblctn/rprt/nnlrprt/nnlrprt-eng.html" MODIFIED="1375212371516" TEXT="neb-one.gc.ca &gt; Clf-nsi &gt; Rpblctn &gt; Rprt &gt; Nnlrprt &gt; Nnlrprt-eng"/>
<node CREATED="1375210117048" ID="ID_1368889445" LINK="http://www.energy.alberta.ca/About_Us/1001.asp" MODIFIED="1375210117048" TEXT="energy.alberta.ca &gt; About Us &gt; 1001"/>
</node>
<node CREATED="1372873699550" ID="ID_1516989531" MODIFIED="1375459109898" TEXT="Transportation costs">
<node CREATED="1375212371516" ID="ID_1583854893" LINK="http://www.neb-one.gc.ca/clf-nsi/rpblctn/rprt/nnlrprt/nnlrprt-eng.html" MODIFIED="1375212371516" TEXT="neb-one.gc.ca &gt; Clf-nsi &gt; Rpblctn &gt; Rprt &gt; Nnlrprt &gt; Nnlrprt-eng"/>
<node CREATED="1375210117048" ID="ID_1638356738" LINK="http://www.energy.alberta.ca/About_Us/1001.asp" MODIFIED="1375210117048" TEXT="energy.alberta.ca &gt; About Us &gt; 1001"/>
<node CREATED="1375459107434" ID="ID_1766871799" LINK="http://www.energy.alberta.ca/OilSands/1189.asp" MODIFIED="1375459107434" TEXT="energy.alberta.ca &gt; OilSands &gt; 1189"/>
</node>
<node CREATED="1372873704324" ID="ID_8539488" MODIFIED="1375120102613" TEXT="Inventory costs">
<node CREATED="1375457888995" ID="ID_123209065" LINK="http://www.conferenceboard.ca/e-library/abstract.aspx?did=5148" MODIFIED="1375457888995" TEXT="conferenceboard.ca &gt; E-library &gt; Abstract ? ..."/>
</node>
<node CREATED="1372873721101" ID="ID_1582205539" MODIFIED="1375120106796" TEXT="Cost of inputs">
<node CREATED="1375457889720" ID="ID_1845463784" LINK="http://www.conferenceboard.ca/e-library/abstract.aspx?did=5148" MODIFIED="1375457889720" TEXT="conferenceboard.ca &gt; E-library &gt; Abstract ? ..."/>
<node CREATED="1375454777181" ID="ID_980183703" LINK="http://albertacanada.com/business/statistics/oil-sands-quarterly.aspx" MODIFIED="1375454777181" TEXT="albertacanada.com &gt; Business &gt; Statistics &gt; Oil-sands-quarterly"/>
<node CREATED="1375459276188" ID="ID_530436651" LINK="http://www.energy.alberta.ca/Oil/1199.asp#ERCBeor" MODIFIED="1375459276188" TEXT="energy.alberta.ca &gt; Oil &gt; 1199"/>
</node>
</node>
<node CREATED="1372801725641" ID="ID_250207312" MODIFIED="1375124021916" TEXT="Environmental Costs">
<icon BUILTIN="stop"/>
<node CREATED="1372883113243" ID="ID_1557765356" MODIFIED="1372883117363" TEXT="Tailings waste">
<node CREATED="1375463872496" LINK="http://www.aer.ca/rules-and-regulations/directives/directive-074" MODIFIED="1375463872496" TEXT="aer.ca &gt; Rules-and-regulations &gt; Directives &gt; Directive-074"/>
<node CREATED="1375464050321" LINK="http://www.groundworkcanada.org/node/253" MODIFIED="1375464050321" TEXT="groundworkcanada.org &gt; Node &gt; 253"/>
</node>
<node CREATED="1372883117701" ID="ID_1809672130" MODIFIED="1372883125092" TEXT="Toxic waste disposal">
<node CREATED="1375462396904" LINK="http://www.energy.alberta.ca/OilSands/1189.asp" MODIFIED="1375462396904" TEXT="energy.alberta.ca &gt; OilSands &gt; 1189"/>
<node CREATED="1375464053969" LINK="http://www.groundworkcanada.org/node/253" MODIFIED="1375464053969" TEXT="groundworkcanada.org &gt; Node &gt; 253"/>
</node>
<node CREATED="1372883132713" ID="ID_149453151" MODIFIED="1375463851595" TEXT="Waste water">
<node CREATED="1375210117048" ID="ID_1859545858" LINK="http://www.energy.alberta.ca/About_Us/1001.asp" MODIFIED="1375210117048" TEXT="energy.alberta.ca &gt; About Us &gt; 1001"/>
<node CREATED="1375463851996" LINK="http://www.aer.ca/rules-and-regulations/directives/directive-074" MODIFIED="1375463851996" TEXT="aer.ca &gt; Rules-and-regulations &gt; Directives &gt; Directive-074"/>
<node CREATED="1375463938299" LINK="http://www.oag-bvg.gc.ca/internet/English/parl_cesd_201212_e_37708.html" MODIFIED="1375463938299" TEXT="oag-bvg.gc.ca &gt; Internet &gt; English &gt; Parl cesd 201212 e 37708"/>
</node>
<node CREATED="1372880002234" ID="ID_1368861131" MODIFIED="1372880008908" TEXT="Environmental risk">
<node CREATED="1375464771828" LINK="http://www.conferenceboard.ca/e-library/abstract.aspx?did=5148" MODIFIED="1375464771828" TEXT="conferenceboard.ca &gt; E-library &gt; Abstract ? ..."/>
<node CREATED="1375454777181" ID="ID_636351667" LINK="http://albertacanada.com/business/statistics/oil-sands-quarterly.aspx" MODIFIED="1375454777181" TEXT="albertacanada.com &gt; Business &gt; Statistics &gt; Oil-sands-quarterly"/>
<node CREATED="1375465138710" LINK="http://www.oag-bvg.gc.ca/internet/English/parl_cesd_201212_e_37708.html" MODIFIED="1375465138710" TEXT="oag-bvg.gc.ca &gt; Internet &gt; English &gt; Parl cesd 201212 e 37708"/>
<node CREATED="1375210974346" ID="ID_1055851616" LINK="http://rsc-src.ca/sites/default/files/pdf/RSC_ExP_ExecutiveSummary_ENG_Dec14_10_FINAL_v5.pdf" MODIFIED="1375210974346">
<richcontent TYPE="NODE"><html>
  <head>
    
  </head>
  <body>
    <a href="http://rsc-src.ca/sites/default/files/pdf/RSC_ExP_ExecutiveSummary_ENG_Dec14_10_FINAL_v5.pdf">http://rsc-src.ca/sites/default/files/pdf/RSC_ExP_ExecutiveSummary_ENG_Dec14_10_FINAL_v5.pdf</a>
  </body>
</html></richcontent>
</node>
</node>
<node CREATED="1375124142407" ID="ID_160753868" MODIFIED="1375124154761" TEXT="Need to prepare for oil spill">
<node CREATED="1375464667970" LINK="http://www.cnrl.com/investor-information/financial-information/financial-reports/annual-report.html" MODIFIED="1375464667970" TEXT="cnrl.com &gt; Investor-information &gt; Financial-information &gt; Financial-reports &gt; Annual-report"/>
</node>
<node CREATED="1372876902784" ID="ID_655141595" MODIFIED="1372876939773" TEXT="Continued growth presents a challenge to reduce GHG emissions">
<node CREATED="1375465050165" ID="ID_1503278013" LINK="http://www.eipa.alberta.ca/media/39640/life%20cycle%20analysis%20jacobs%20final%20report.pdf" MODIFIED="1375465050165" TEXT="eipa.alberta.ca &gt; Media &gt; 39640 &gt; Life cycle analysis jacobs final report"/>
</node>
<node CREATED="1375114657011" ID="ID_158956766" MODIFIED="1375114661144" TEXT="Footprint">
<node CREATED="1375114663333" ID="ID_231468196" MODIFIED="1375114676659" TEXT="Carbon footprint">
<node CREATED="1375465136466" LINK="http://www.oag-bvg.gc.ca/internet/English/parl_cesd_201212_e_37708.html" MODIFIED="1375465136466" TEXT="oag-bvg.gc.ca &gt; Internet &gt; English &gt; Parl cesd 201212 e 37708"/>
</node>
<node CREATED="1375114676963" ID="ID_1841938710" MODIFIED="1375114684746" TEXT="GHG footprint">
<node CREATED="1375465050165" ID="ID_1328290303" LINK="http://www.eipa.alberta.ca/media/39640/life%20cycle%20analysis%20jacobs%20final%20report.pdf" MODIFIED="1375465050165" TEXT="eipa.alberta.ca &gt; Media &gt; 39640 &gt; Life cycle analysis jacobs final report"/>
</node>
<node CREATED="1375114685033" ID="ID_596955912" MODIFIED="1375114692860" TEXT="Environmental footprint">
<node CREATED="1375464770251" LINK="http://www.conferenceboard.ca/e-library/abstract.aspx?did=5148" MODIFIED="1375464770251" TEXT="conferenceboard.ca &gt; E-library &gt; Abstract ? ..."/>
<node CREATED="1375454777181" ID="ID_1221725710" LINK="http://albertacanada.com/business/statistics/oil-sands-quarterly.aspx" MODIFIED="1375454777181" TEXT="albertacanada.com &gt; Business &gt; Statistics &gt; Oil-sands-quarterly"/>
<node CREATED="1375210117048" ID="ID_1104334045" LINK="http://www.energy.alberta.ca/About_Us/1001.asp" MODIFIED="1375210117048" TEXT="energy.alberta.ca &gt; About Us &gt; 1001"/>
<node CREATED="1375210974346" ID="ID_941128743" LINK="http://rsc-src.ca/sites/default/files/pdf/RSC_ExP_ExecutiveSummary_ENG_Dec14_10_FINAL_v5.pdf" MODIFIED="1375210974346">
<richcontent TYPE="NODE"><html>
  <head>
    
  </head>
  <body>
    <a href="http://rsc-src.ca/sites/default/files/pdf/RSC_ExP_ExecutiveSummary_ENG_Dec14_10_FINAL_v5.pdf">http://rsc-src.ca/sites/default/files/pdf/RSC_ExP_ExecutiveSummary_ENG_Dec14_10_FINAL_v5.pdf</a>
  </body>
</html></richcontent>
</node>
</node>
</node>
<node CREATED="1372879704332" ID="ID_1595440483" MODIFIED="1375123601016" TEXT="Concern for quality of the  air, water and environment">
<node CREATED="1375210974346" ID="ID_1131487860" LINK="http://rsc-src.ca/sites/default/files/pdf/RSC_ExP_ExecutiveSummary_ENG_Dec14_10_FINAL_v5.pdf" MODIFIED="1375210974346">
<richcontent TYPE="NODE"><html>
  <head>
    
  </head>
  <body>
    <a href="http://rsc-src.ca/sites/default/files/pdf/RSC_ExP_ExecutiveSummary_ENG_Dec14_10_FINAL_v5.pdf">http://rsc-src.ca/sites/default/files/pdf/RSC_ExP_ExecutiveSummary_ENG_Dec14_10_FINAL_v5.pdf</a>
  </body>
</html></richcontent>
</node>
</node>
</node>
<node CREATED="1375112449098" ID="ID_298185815" MODIFIED="1375220499361" TEXT="Decrease dependency on oil and imports, and to diversify energy sources">
<icon BUILTIN="stop"/>
<node CREATED="1375210117048" ID="ID_1350153134" LINK="http://www.energy.alberta.ca/About_Us/1001.asp" MODIFIED="1375210117048" TEXT="energy.alberta.ca &gt; About Us &gt; 1001"/>
</node>
<node CREATED="1372796550179" ID="ID_1091730395" MODIFIED="1375124214600" TEXT="Still needed">
<icon BUILTIN="stop"/>
<node CREATED="1372878603262" ID="ID_776365377" MODIFIED="1375124221513" TEXT="More understanding and more data">
<node CREATED="1375220928523" ID="ID_879805123" LINK="http://www.energy.alberta.ca/About_Us/1000.asp" MODIFIED="1375220928523" TEXT="energy.alberta.ca &gt; About Us &gt; 1000"/>
<node CREATED="1375212386353" ID="ID_524594097" LINK="http://www.neb-one.gc.ca/clf-nsi/rpblctn/rprt/nnlrprt/nnlrprt-eng.html" MODIFIED="1375212386353" TEXT="neb-one.gc.ca &gt; Clf-nsi &gt; Rpblctn &gt; Rprt &gt; Nnlrprt &gt; Nnlrprt-eng"/>
</node>
</node>
</node>
<node CREATED="1375108078282" HGAP="-188" ID="ID_1213331740" MODIFIED="1384733191764" POSITION="right" TEXT="NGO Perspective" VSHIFT="123">
<node CREATED="1375201519554" ID="ID_160547099" MODIFIED="1375201548103" TEXT="Benefits for Canadians">
<icon BUILTIN="go"/>
<node CREATED="1372796223669" ID="ID_1924060612" MODIFIED="1375201554558" TEXT="Maximize profits for the good of Canadians">
<node CREATED="1375466114843" ID="ID_1600467066" LINK="http://www.pembina.org/pub/203" MODIFIED="1375466114843" TEXT="pembina.org &gt; Pub &gt; 203"/>
</node>
<node CREATED="1375201599404" ID="ID_1529580037" MODIFIED="1375201605478" TEXT="A stimulated economy">
<node CREATED="1375467680817" LINK="http://www.homelesshub.ca/library/taming-the-tempest-an-alternate-development-strategy-for-alberta-35394.aspx" MODIFIED="1375467680817" TEXT="homelesshub.ca &gt; Library &gt; Taming-the-tempest-an-alternate-development-strategy-for-alberta-35394"/>
<node CREATED="1375469098805" LINK="http://www.pembina.org/pub/1622" MODIFIED="1375469098805" TEXT="pembina.org &gt; Pub &gt; 1622"/>
</node>
<node CREATED="1375202779993" ID="ID_1400126357" MODIFIED="1375202784349" TEXT="GDP growth">
<node CREATED="1375469097412" LINK="http://www.pembina.org/pub/1622" MODIFIED="1375469097412" TEXT="pembina.org &gt; Pub &gt; 1622"/>
<node CREATED="1375469989922" LINK="http://www.pembina.org/pub/2345" MODIFIED="1375469989922" TEXT="pembina.org &gt; Pub &gt; 2345"/>
</node>
</node>
<node CREATED="1375109058885" ID="ID_1475377340" MODIFIED="1375109252770" TEXT="Involving First Nations ">
<icon BUILTIN="prepare"/>
<node CREATED="1375109167050" ID="ID_66259618" MODIFIED="1375114457007" TEXT="Protecting aboriginal treaties and rights">
<node CREATED="1375465490960" LINK="http://www.pembina.org/pub/2289" MODIFIED="1375465490960" TEXT="pembina.org &gt; Pub &gt; 2289"/>
</node>
<node CREATED="1375109287305" ID="ID_1206288629" MODIFIED="1375109301978" TEXT="Aboriginal land rights">
<node CREATED="1375470582085" LINK="http://environmentaldefence.ca/reports/canadas-toxic-tar-sands-most-destructive-project-earth" MODIFIED="1375470582085" TEXT="environmentaldefence.ca &gt; Reports &gt; Canadas-toxic-tar-sands-most-destructive-project-earth"/>
<node CREATED="1375470846962" LINK="http://dirtyoilsands.org/reports/carbon_copy_preventing_oil_sands_fever_in_saskatchewan" MODIFIED="1375470846962" TEXT="dirtyoilsands.org &gt; Reports &gt; Carbon copy preventing oil sands fever in saskatchewan"/>
</node>
<node CREATED="1375109302338" ID="ID_1940040874" MODIFIED="1375470252833" TEXT="Opposition from First Nations">
<node CREATED="1375470188759" LINK="http://tarsandssolutions.org/publications/canadas-oil-sands---shrinking-window-of-opportunity" MODIFIED="1375470188759">
<richcontent TYPE="NODE"><html>
  <head>
    
  </head>
  <body>
    <a href="http://tarsandssolutions.org/publications/canadas-oil-sands---shrinking-window-of-opportunity">http://tarsandssolutions.org/publications/canadas-oil-sands---shrinking-window-of-opportunity</a>
  </body>
</html></richcontent>
</node>
<node CREATED="1375470253327" LINK="http://www.nrdc.org/energy/files/TarSandsInvasion-full.pdf" MODIFIED="1375470253327" TEXT="nrdc.org &gt; Energy &gt; Files &gt; TarSandsInvasion-full"/>
<node CREATED="1375470642455" LINK="http://www.greenpeace.org/canada/en/campaigns/Energy/tarsands/Resources/Reports/shellreport/" MODIFIED="1375470642455" TEXT="greenpeace.org &gt; Canada &gt; En &gt; Campaigns &gt; Energy &gt; Tarsands &gt; Resources &gt; Reports &gt; Shellreport"/>
</node>
<node CREATED="1375204578070" ID="ID_1450148432" MODIFIED="1375204583687" TEXT="Preserve First Nations traditions ">
<node CREATED="1375470676834" LINK="http://www.greenpeace.org.uk/media/reports/tar-sands-your-tank" MODIFIED="1375470676834" TEXT="greenpeace.org.uk &gt; Media &gt; Reports &gt; Tar-sands-your-tank"/>
</node>
</node>
<node CREATED="1375202179705" ID="ID_1710569448" MODIFIED="1375205238605" TEXT="Develop responsibly">
<icon BUILTIN="prepare"/>
<node CREATED="1375202199911" ID="ID_1203633961" MODIFIED="1375202238249" TEXT="Consider an acceptable pace of development and acceptable practices">
<node CREATED="1375469392911" LINK="http://www.pembina.org/pub/2404" MODIFIED="1375469392911" TEXT="pembina.org &gt; Pub &gt; 2404"/>
</node>
<node CREATED="1372787862432" ID="ID_792148192" MODIFIED="1375473417718" TEXT="Develop clean technologies">
<node CREATED="1375473228505" LINK="http://www.greenpeace.org.uk/media/reports/tar-sands-your-tank" MODIFIED="1375473228505" TEXT="greenpeace.org.uk &gt; Media &gt; Reports &gt; Tar-sands-your-tank"/>
<node CREATED="1375473283593" LINK="http://www.nrdc.org/energy/going-in-reverse.asp" MODIFIED="1375473283593" TEXT="nrdc.org &gt; Energy &gt; Going-in-reverse"/>
<node CREATED="1375473418061" LINK="http://dirtyoilsands.org/reports/staying_hooked_on_a_dirty_fuel_why_canadian_tar_sands_pipelines_are_a_bad_b" MODIFIED="1375473418061" TEXT="dirtyoilsands.org &gt; Reports &gt; Staying hooked on a dirty fuel why canadian tar sands pipelines are a bad b"/>
</node>
<node CREATED="1375202751492" ID="ID_1076007546" MODIFIED="1375474406101" TEXT="Develop a plan, measures and standards">
<node CREATED="1375474044893" LINK="http://www.water-matters.org/story/442" MODIFIED="1375474044893" TEXT="water-matters.org &gt; Story &gt; 442"/>
<node CREATED="1375474275431" LINK="http://www.pembina.org/pub/1262" MODIFIED="1375474275431" TEXT="pembina.org &gt; Pub &gt; 1262"/>
<node CREATED="1375474406635" LINK="http://www.pembina.org/pub/2101" MODIFIED="1375474406635" TEXT="pembina.org &gt; Pub &gt; 2101"/>
</node>
<node CREATED="1375202787087" ID="ID_42916412" MODIFIED="1375202799900" TEXT="Consider smart and sustainable growth">
<node CREATED="1375473500948" LINK="http://www.homelesshub.ca/library/taming-the-tempest-an-alternate-development-strategy-for-alberta-35394.aspx" MODIFIED="1375473500948" TEXT="homelesshub.ca &gt; Library &gt; Taming-the-tempest-an-alternate-development-strategy-for-alberta-35394"/>
</node>
<node CREATED="1372796330308" ID="ID_1806796240" MODIFIED="1375204341528" TEXT="Minimize economic costs">
<node CREATED="1375474503699" LINK="http://dirtyoilsands.org/reports/the_keystone_xl_pipeline_not_needed_too_expensive_better_solutions_exist" MODIFIED="1375474503699" TEXT="dirtyoilsands.org &gt; Reports &gt; The keystone xl pipeline not needed too expensive better solutions exist"/>
</node>
<node CREATED="1372796834362" ID="ID_1450074399" MODIFIED="1375204288194" TEXT="Need for collaboration">
<node CREATED="1375473832095" LINK="http://dirtyoilsands.org/reports/toxic_trail_exposure_youth_delegation_tracks_tar_sands_in_great_lakes_regio" MODIFIED="1375473832095" TEXT="dirtyoilsands.org &gt; Reports &gt; Toxic trail exposure youth delegation tracks tar sands in great lakes regio"/>
</node>
<node CREATED="1372796844048" ID="ID_250297501" MODIFIED="1375474201024" TEXT="Need for planning, policy, regulations">
<node CREATED="1375473562167" LINK="http://dirtyoilsands.org/reports/carbon_copy_preventing_oil_sands_fever_in_saskatchewan" MODIFIED="1375473562167" TEXT="dirtyoilsands.org &gt; Reports &gt; Carbon copy preventing oil sands fever in saskatchewan"/>
<node CREATED="1375474201449" LINK="http://www.pembina.org/pub/1622" MODIFIED="1375474201449" TEXT="pembina.org &gt; Pub &gt; 1622"/>
</node>
<node CREATED="1375204972256" ID="ID_1138373431" MODIFIED="1375204989427" TEXT="Consider the viability">
<node CREATED="1372801203965" ID="ID_1872276039" MODIFIED="1372801339068" TEXT="Of oil">
<node CREATED="1375478103895" LINK="http://www.pembina.org/pub/1262" MODIFIED="1375478103895" TEXT="pembina.org &gt; Pub &gt; 1262"/>
</node>
<node CREATED="1372801342318" ID="ID_1435975953" MODIFIED="1372801348277" TEXT="Of the Keystone XL">
<node CREATED="1375460512490" LINK="http://www.nrdc.org/energy/keystone-pipeline/higher-oil-prices.asp" MODIFIED="1375460512490" TEXT="nrdc.org &gt; Energy &gt; Keystone-pipeline &gt; Higher-oil-prices"/>
</node>
<node CREATED="1372801359893" ID="ID_181325788" MODIFIED="1372801369166" TEXT="Financial viability">
<node CREATED="1375478000678" LINK="http://www.foei.org/en/resources/publications/pdfs/2010/tar-sands-fuelling-the-climate-crisis-undermining-eu-energy-security-and-damaging-development-objectives/view" MODIFIED="1375478000678" TEXT="foei.org &gt; En &gt; Resources &gt; Publications &gt; Pdfs &gt; 2010 &gt; Tar-sands-fuelling-the-climate-crisis-undermining-eu-energy-security-and-damaging-development-objectives &gt; View"/>
</node>
</node>
</node>
<node CREATED="1375113415115" ID="ID_1432556700" MODIFIED="1375201285521" TEXT="Control the impacts on the environment">
<icon BUILTIN="prepare"/>
<node CREATED="1375205759375" ID="ID_569593040" MODIFIED="1375205902543" TEXT="Water">
<node CREATED="1372786285207" ID="ID_1330033237" MODIFIED="1375205777748" TEXT="Water control regulations">
<node CREATED="1375465689685" LINK="http://www.water-matters.org/story/442" MODIFIED="1375465689685" TEXT="water-matters.org &gt; Story &gt; 442"/>
</node>
<node CREATED="1372797959221" ID="ID_849012877" MODIFIED="1375205860682" TEXT="Preserve water sheds">
<node CREATED="1375465690916" LINK="http://www.water-matters.org/story/442" MODIFIED="1375465690916" TEXT="water-matters.org &gt; Story &gt; 442"/>
<node CREATED="1375479480434" LINK="http://www.pembina.org/pub/1622" MODIFIED="1375479480434" TEXT="pembina.org &gt; Pub &gt; 1622"/>
</node>
<node CREATED="1372797702507" ID="ID_1889776697" MODIFIED="1375204559852" TEXT="Preference for the use of saline water">
<node CREATED="1375478354910" LINK="http://tarsandssolutions.org/publications/canadas-oil-sands---shrinking-window-of-opportunity" MODIFIED="1375478354910" TEXT="tarsandssolutions.org &gt; Publications &gt; Canadas-oil-sands---shrinking-window-of-opportunity"/>
</node>
<node CREATED="1372796604570" ID="ID_561122731" MODIFIED="1375204284981" TEXT="Need for responsible water management, water conservation">
<node CREATED="1375478314016" LINK="http://tarsandssolutions.org/publications/canadas-oil-sands---shrinking-window-of-opportunity" MODIFIED="1375478314016" TEXT="tarsandssolutions.org &gt; Publications &gt; Canadas-oil-sands---shrinking-window-of-opportunity"/>
<node CREATED="1375479472105" LINK="http://www.pembina.org/pub/1622" MODIFIED="1375479472105" TEXT="pembina.org &gt; Pub &gt; 1622"/>
</node>
<node CREATED="1372796339320" ID="ID_17663077" MODIFIED="1375204369751" TEXT="Minimize use of fresh water">
<node CREATED="1375478315317" LINK="http://tarsandssolutions.org/publications/canadas-oil-sands---shrinking-window-of-opportunity" MODIFIED="1375478315317" TEXT="tarsandssolutions.org &gt; Publications &gt; Canadas-oil-sands---shrinking-window-of-opportunity"/>
</node>
<node CREATED="1372796346902" ID="ID_1744596153" MODIFIED="1375204373714" TEXT="Minimize risk to water resources">
<node CREATED="1375478317351" LINK="http://tarsandssolutions.org/publications/canadas-oil-sands---shrinking-window-of-opportunity" MODIFIED="1375478317351" TEXT="tarsandssolutions.org &gt; Publications &gt; Canadas-oil-sands---shrinking-window-of-opportunity"/>
<node CREATED="1375478622217" LINK="http://www.nrdc.org/energy/files/TarSandsInvasion-full.pdf" MODIFIED="1375478622217" TEXT="nrdc.org &gt; Energy &gt; Files &gt; TarSandsInvasion-full"/>
</node>
<node CREATED="1375201287794" ID="ID_131692449" MODIFIED="1375201300676" TEXT="Avoid contaminating water">
<node CREATED="1375465699773" ID="ID_1686308717" LINK="http://www.water-matters.org/story/442" MODIFIED="1375465699773" TEXT="water-matters.org &gt; Story &gt; 442"/>
</node>
</node>
<node CREATED="1375205786051" ID="ID_44054314" MODIFIED="1375205790126" TEXT="Emissions">
<node CREATED="1372786323483" ID="ID_522486666" MODIFIED="1375113555584" TEXT="Control pollution and GHG emissions">
<node CREATED="1375481199949" LINK="http://www.pembina.org/pub/2040" MODIFIED="1375481199949" TEXT="pembina.org &gt; Pub &gt; 2040"/>
<node CREATED="1375481448959" LINK="http://www.pembina.org/pub/2414" MODIFIED="1375481448959" TEXT="pembina.org &gt; Pub &gt; 2414"/>
</node>
<node CREATED="1372783022633" ID="ID_1022691368" MODIFIED="1375201143256" TEXT="Acceptable levels of emissions">
<node CREATED="1375481376419" LINK="http://www.pembina.org/pub/2345" MODIFIED="1375481376419" TEXT="pembina.org &gt; Pub &gt; 2345"/>
</node>
<node CREATED="1375201479018" ID="ID_814562165" MODIFIED="1375201506022" TEXT="Emissions reduction is a benefit">
<node CREATED="1375481444645" LINK="http://www.pembina.org/pub/2414" MODIFIED="1375481444645" TEXT="pembina.org &gt; Pub &gt; 2414"/>
<node CREATED="1375481485752" LINK="http://www.pembina.org/pub/1909" MODIFIED="1375481485752" TEXT="pembina.org &gt; Pub &gt; 1909"/>
</node>
<node CREATED="1372796304331" ID="ID_296113559" MODIFIED="1375203296073" TEXT="Minimize GHG emissions">
<node CREATED="1375481202266" ID="ID_515781982" LINK="http://www.pembina.org/pub/2040" MODIFIED="1375481202266" TEXT="pembina.org &gt; Pub &gt; 2040"/>
<node CREATED="1375481351810" LINK="http://www.pembina.org/pub/1779" MODIFIED="1375481351810" TEXT="pembina.org &gt; Pub &gt; 1779"/>
</node>
</node>
<node CREATED="1375205803466" ID="ID_466713866" MODIFIED="1375205810845" TEXT="Environment">
<node CREATED="1372792458746" ID="ID_980476638" MODIFIED="1375998475233" TEXT="Protect the environment">
<node CREATED="1375998403504" LINK="http://environmentaldefence.ca/reports/canadas-toxic-tar-sands-most-destructive-project-earth" MODIFIED="1375998403504" TEXT="environmentaldefence.ca &gt; Reports &gt; Canadas-toxic-tar-sands-most-destructive-project-earth"/>
<node CREATED="1375998475966" LINK="http://www.boell.de/publications/publications-12097.html" MODIFIED="1375998475966" TEXT="boell.de &gt; Publications &gt; Publications-12097"/>
</node>
<node CREATED="1375201253509" ID="ID_1768740088" MODIFIED="1375201265403" TEXT="Avoid environmental damage and costs for damage">
<node CREATED="1375999201859" LINK="http://www.pembina.org/pub/1650" MODIFIED="1375999201859" TEXT="pembina.org &gt; Pub &gt; 1650"/>
</node>
<node CREATED="1372796315998" ID="ID_206898950" MODIFIED="1376054386760" TEXT="Minimize environmental costs and harm">
<node CREATED="1376054065820" LINK="http://www.policyalternatives.ca/publications/reports/bitumen-cliff" MODIFIED="1376054065820" TEXT="policyalternatives.ca &gt; Publications &gt; Reports &gt; Bitumen-cliff"/>
<node CREATED="1376054162675" LINK="http://www.pembina.org/pub/1760" MODIFIED="1376054162675" TEXT="pembina.org &gt; Pub &gt; 1760"/>
<node CREATED="1376054387887" LINK="http://www.pembina.org/pub/1571" MODIFIED="1376054387887">
<richcontent TYPE="NODE"><html>
  <head>
    
  </head>
  <body>
    <a href="http://www.pembina.org/pub/1571">http://www.pembina.org/pub/1571</a>
  </body>
</html></richcontent>
</node>
</node>
<node CREATED="1372801349546" ID="ID_925015687" MODIFIED="1372801359267" TEXT="Ensure ecological viability">
<node CREATED="1376054585234" ID="ID_1315614406" LINK="http://www.pembina.org/pub/1622" MODIFIED="1376054585234" TEXT="pembina.org &gt; Pub &gt; 1622"/>
<node CREATED="1376054612189" LINK="http://www.pembina.org/pub/1650" MODIFIED="1376054612189" TEXT="pembina.org &gt; Pub &gt; 1650"/>
</node>
</node>
<node CREATED="1375205811235" ID="ID_1013923817" MODIFIED="1375205812649" TEXT="Climate">
<node CREATED="1372786362990" ID="ID_231569198" MODIFIED="1376055097735" TEXT="Keeping climate in control">
<node CREATED="1376055033022" LINK="http://corpethics.org/downloads/WEO2010%20Oil%20use%20must%20drop_%20Final%20Dec%202010.pdf" MODIFIED="1376055033022" TEXT="corpethics.org &gt; Downloads &gt; WEO2010 Oil use must drop  Final Dec 2010"/>
<node CREATED="1376055098504" LINK="http://www.pembina.org/pub/2393" MODIFIED="1376055098504" TEXT="pembina.org &gt; Pub &gt; 2393"/>
</node>
<node CREATED="1375201265864" ID="ID_203580019" MODIFIED="1375201277614" TEXT="Avoid climate change">
<node CREATED="1375452407313" ID="ID_1536302684" LINK="http://bluegreencanada.ca/sites/default/files/resources/More%20Bang%20for%20Buck%20Nov%202012%20FINAL%20WEB.pdf" MODIFIED="1375452407313">
<richcontent TYPE="NODE"><html>
  <head>
    
  </head>
  <body>
    <a href="http://bluegreencanada.ca/sites/default/files/resources/More%20Bang%20for%20Buck%20Nov%202012%20FINAL%20WEB.pdf">http://bluegreencanada.ca/sites/default/files/resources/More%20Bang%20for%20Buck%20Nov%202012%20FINAL%20WEB.pdf</a>
  </body>
</html></richcontent>
</node>
<node CREATED="1375998956747" LINK="http://environmentaldefence.ca/reports/divided-we-fall-tar-sands-vs-rest-canada" MODIFIED="1375998956747" TEXT="environmentaldefence.ca &gt; Reports &gt; Divided-we-fall-tar-sands-vs-rest-canada"/>
</node>
</node>
<node CREATED="1375205947263" ID="ID_222559183" MODIFIED="1375205948956" TEXT="Waste">
<node CREATED="1372786308162" ID="ID_1901694050" MODIFIED="1376056013949" TEXT="Waste control regulations">
<node CREATED="1376055955212" LINK="http://www.pembina.org/pub/1760" MODIFIED="1376055955212" TEXT="pembina.org &gt; Pub &gt; 1760"/>
<node CREATED="1376056014439" LINK="http://www.pembina.org/pub/1839" MODIFIED="1376056014439" TEXT="pembina.org &gt; Pub &gt; 1839"/>
</node>
<node CREATED="1372801715343" ID="ID_855889018" MODIFIED="1372801721022" TEXT="Reusing waste heat">
<node CREATED="1376055670064" LINK="http://tarsandssolutions.org/publications/financing-of-fossil-fuels-and-renewable-energy-by-canadian-banks" MODIFIED="1376055670064" TEXT="tarsandssolutions.org &gt; Publications &gt; Financing-of-fossil-fuels-and-renewable-energy-by-canadian-banks"/>
</node>
<node CREATED="1375112951664" ID="ID_886100252" MODIFIED="1375112982357" TEXT="References to Directive 74 and the importance of those guidelines">
<node CREATED="1376056110979" LINK="http://www.aer.ca/rules-and-regulations/directives/directive-074" MODIFIED="1376056110979" TEXT="aer.ca &gt; Rules-and-regulations &gt; Directives &gt; Directive-074"/>
</node>
</node>
<node CREATED="1375205988806" ID="ID_1801505230" MODIFIED="1375205992445" TEXT="Biodiversity">
<node CREATED="1372797926961" ID="ID_133521160" MODIFIED="1375205283600" TEXT="Preserve biodiversity">
<node CREATED="1375465659190" LINK="http://dirtyoilsands.org/reports/migration_of_whooping_cranes_grus_americana_through_albertas_bitumen_sands_" MODIFIED="1375465659190" TEXT="dirtyoilsands.org &gt; Reports &gt; Migration of whooping cranes grus americana through albertas bitumen sands "/>
<node CREATED="1375469038358" LINK="http://www.pembina.org/pub/1622" MODIFIED="1375469038358" TEXT="pembina.org &gt; Pub &gt; 1622"/>
</node>
</node>
</node>
<node CREATED="1375201366682" ID="ID_1877383108" MODIFIED="1375201380576" TEXT="Negative impacts on the environment">
<icon BUILTIN="stop"/>
<node CREATED="1375110583047" ID="ID_1907223475" MODIFIED="1375110637391" TEXT="Concern for the Athabasca region and the Athabasca river water shed">
<node CREATED="1375479298764" LINK="http://www.safewater.org/PDFS/reportlibrary/WateredDownOvercomingFederalInactionontheImpactofOilSandsDevelopmenttoWaterResources.pdf" MODIFIED="1375479298764">
<richcontent TYPE="NODE"><html>
  <head>
    
  </head>
  <body>
    <a href="http://www.safewater.org/PDFS/reportlibrary/WateredDownOvercomingFederalInactionontheImpactofOilSandsDevelopmenttoWaterResources.pdf">http://www.safewater.org/PDFS/reportlibrary/WateredDownOvercomingFederalInactionontheImpactofOilSandsDevelopmenttoWaterResources.pdf</a>
  </body>
</html></richcontent>
</node>
</node>
<node CREATED="1372792634613" ID="ID_1867009423" MODIFIED="1372792653128" TEXT="Lack of evidence provided by Enbridge about the pipeline">
<node CREATED="1375480528866" LINK="http://www.pembina.org/pub/2143" MODIFIED="1375480528866" TEXT="pembina.org &gt; Pub &gt; 2143"/>
</node>
<node CREATED="1375114657011" ID="ID_918518600" MODIFIED="1375114661144" TEXT="Footprint">
<node CREATED="1375114663333" ID="ID_1705032515" MODIFIED="1375479676110" TEXT="Carbon footprint">
<node CREATED="1375479603930" LINK="http://tarsandssolutions.org/publications/canadas-oil-sands---shrinking-window-of-opportunity" MODIFIED="1375479603930" TEXT="tarsandssolutions.org &gt; Publications &gt; Canadas-oil-sands---shrinking-window-of-opportunity"/>
<node CREATED="1375479674548" LINK="http://www.greenpeace.org/canada/en/campaigns/Energy/tarsands/Resources/Background-documents/Dirty-Oil-How-the-tar-sands-are-fueling-the-global-climate-crisis-/" MODIFIED="1375479674548" TEXT="greenpeace.org &gt; Canada &gt; En &gt; Campaigns &gt; Energy &gt; Tarsands &gt; Resources &gt; Background-documents &gt; Dirty-Oil-How-the-tar-sands-are-fueling-the-global-climate-crisis-"/>
</node>
<node CREATED="1375114676963" ID="ID_630113361" MODIFIED="1375114684746" TEXT="GHG footprint">
<node CREATED="1375479756608" LINK="http://priceofoil.org/2013/01/17/petroleum-coke-the-coal-hiding-in-the-tar-sands/" MODIFIED="1375479756608" TEXT="priceofoil.org &gt; 2013 &gt; 01 &gt; 17 &gt; Petroleum-coke-the-coal-hiding-in-the-tar-sands"/>
</node>
<node CREATED="1375114685033" ID="ID_424364113" MODIFIED="1375479847042" TEXT="Environmental footprint">
<node CREATED="1375479793224" LINK="http://www.policyalternatives.ca/publications/commentary/fuelling-fortress-america" MODIFIED="1375479793224" TEXT="policyalternatives.ca &gt; Publications &gt; Commentary &gt; Fuelling-fortress-america"/>
<node CREATED="1375479847615" LINK="http://www.water-matters.org/story/442" MODIFIED="1375479847615" TEXT="water-matters.org &gt; Story &gt; 442"/>
</node>
<node CREATED="1375114777925" ID="ID_724527187" MODIFIED="1375480134750" TEXT="Footprint on the land">
<node CREATED="1375480090915" LINK="http://www.pembina.org/pub/1635" MODIFIED="1375480090915" TEXT="pembina.org &gt; Pub &gt; 1635"/>
<node CREATED="1375480135223" LINK="http://www.pembina.org/pub/1262" MODIFIED="1375480135223" TEXT="pembina.org &gt; Pub &gt; 1262"/>
</node>
<node CREATED="1375114783970" ID="ID_611197216" MODIFIED="1375480021968" TEXT="Industrial footrpint">
<node CREATED="1375479870480" LINK="http://www.pembina.org/pub/1622" MODIFIED="1375479870480" TEXT="pembina.org &gt; Pub &gt; 1622"/>
<node CREATED="1375480022390" LINK="http://www.pembina.org/pub/1760" MODIFIED="1375480022390" TEXT="pembina.org &gt; Pub &gt; 1760"/>
</node>
</node>
<node CREATED="1375205101219" ID="ID_1721240862" MODIFIED="1375205102578" TEXT="Risk">
<node CREATED="1372798447237" ID="ID_232625970" MODIFIED="1372798458640" TEXT="Of GHG">
<node CREATED="1375481069927" LINK="http://www.pembina.org/pub/2393" MODIFIED="1375481069927" TEXT="pembina.org &gt; Pub &gt; 2393"/>
<node CREATED="1375481267467" ID="ID_1793020385" LINK="http://www.pembina.org/pub/203" MODIFIED="1375481267467" TEXT="pembina.org &gt; Pub &gt; 203"/>
</node>
<node CREATED="1372798459431" ID="ID_705632117" MODIFIED="1372798465304" TEXT="Environmental risk">
<node CREATED="1375467759911" LINK="http://www.pembina.org/pub/1909" MODIFIED="1375467759911" TEXT="pembina.org &gt; Pub &gt; 1909"/>
</node>
<node CREATED="1372798477271" ID="ID_148075456" MODIFIED="1372798483946" TEXT="Species risk">
<node CREATED="1375464399807" LINK="http://www.pembina.org/pub/1760" MODIFIED="1375464399807" TEXT="pembina.org &gt; Pub &gt; 1760"/>
<node CREATED="1375465647695" ID="ID_290913708" LINK="http://dirtyoilsands.org/reports/migration_of_whooping_cranes_grus_americana_through_albertas_bitumen_sands_" MODIFIED="1375465647695" TEXT="dirtyoilsands.org &gt; Reports &gt; Migration of whooping cranes grus americana through albertas bitumen sands "/>
</node>
<node CREATED="1372798484172" ID="ID_14617209" MODIFIED="1372798487485" TEXT="Water risk">
<node CREATED="1375460736102" LINK="http://www.pembina.org/pub/612" MODIFIED="1375460736102" TEXT="pembina.org &gt; Pub &gt; 612"/>
<node CREATED="1375479266595" LINK="http://www.safewater.org/PDFS/reportlibrary/WateredDownOvercomingFederalInactionontheImpactofOilSandsDevelopmenttoWaterResources.pdf" MODIFIED="1375479266595">
<richcontent TYPE="NODE"><html>
  <head>
    
  </head>
  <body>
    <a href="http://www.safewater.org/PDFS/reportlibrary/WateredDownOvercomingFederalInactionontheImpactofOilSandsDevelopmenttoWaterResources.pdf">http://www.safewater.org/PDFS/reportlibrary/WateredDownOvercomingFederalInactionontheImpactofOilSandsDevelopmenttoWaterResources.pdf</a>
  </body>
</html></richcontent>
</node>
</node>
<node CREATED="1372798488258" ID="ID_95473175" MODIFIED="1375460617844" TEXT="Of tailings seepage">
<node CREATED="1375460600824" LINK="http://www.greenpeace.org/canada/en/campaigns/Energy/tarsands/Resources/Background-documents/Dirty-Oil-How-the-tar-sands-are-fueling-the-global-climate-crisis-/" MODIFIED="1375460600824" TEXT="greenpeace.org &gt; Canada &gt; En &gt; Campaigns &gt; Energy &gt; Tarsands &gt; Resources &gt; Background-documents &gt; Dirty-Oil-How-the-tar-sands-are-fueling-the-global-climate-crisis-"/>
<node CREATED="1375460618299" LINK="http://www.pembina.org/pub/1981" MODIFIED="1375460618299" TEXT="pembina.org &gt; Pub &gt; 1981"/>
<node CREATED="1375464515119" LINK="http://environmentaldefence.ca/reports/11-million-litres-day-tar-sands-leaking-legacy" MODIFIED="1375464515119" TEXT="environmentaldefence.ca &gt; Reports &gt; 11-million-litres-day-tar-sands-leaking-legacy"/>
</node>
</node>
<node CREATED="1375206475773" ID="ID_1328599061" MODIFIED="1375206477507" TEXT="Damage">
<node CREATED="1372432317127" ID="ID_1560708790" MODIFIED="1375480659854" TEXT="Negative impact of production on air quality">
<node CREATED="1375480630291" LINK="http://dirtyoilsands.org/reports/staying_hooked_on_a_dirty_fuel_why_canadian_tar_sands_pipelines_are_a_bad_b" MODIFIED="1375480630291" TEXT="dirtyoilsands.org &gt; Reports &gt; Staying hooked on a dirty fuel why canadian tar sands pipelines are a bad b"/>
<node CREATED="1375480660339" LINK="http://www.pembina.org/pub/203" MODIFIED="1375480660339" TEXT="pembina.org &gt; Pub &gt; 203"/>
</node>
<node CREATED="1372795223745" ID="ID_150053228" MODIFIED="1375479082739" TEXT="Concern for health of ecosystems, environmental health">
<node CREATED="1375465647695" ID="ID_833779268" LINK="http://dirtyoilsands.org/reports/migration_of_whooping_cranes_grus_americana_through_albertas_bitumen_sands_" MODIFIED="1375465647695" TEXT="dirtyoilsands.org &gt; Reports &gt; Migration of whooping cranes grus americana through albertas bitumen sands "/>
<node CREATED="1375479083564" LINK="http://wcel.org/resources/publication/financial-liability-kinder-morgan" MODIFIED="1375479083564" TEXT="wcel.org &gt; Resources &gt; Publication &gt; Financial-liability-kinder-morgan"/>
</node>
<node CREATED="1372798340106" ID="ID_1403690769" MODIFIED="1375203976607" TEXT="Concern for quality of  air, water, ecosystems and  soil">
<node CREATED="1375478642987" LINK="http://www.nrdc.org/energy/files/TarSandsInvasion-full.pdf" MODIFIED="1375478642987" TEXT="nrdc.org &gt; Energy &gt; Files &gt; TarSandsInvasion-full"/>
<node CREATED="1375479131609" LINK="http://www.homelesshub.ca/library/taming-the-tempest-an-alternate-development-strategy-for-alberta-35394.aspx" MODIFIED="1375479131609" TEXT="homelesshub.ca &gt; Library &gt; Taming-the-tempest-an-alternate-development-strategy-for-alberta-35394"/>
</node>
<node CREATED="1372801731275" ID="ID_1980261576" MODIFIED="1372801780053" TEXT="Mining waste in tailings, toxic tailings waste">
<node CREATED="1375464520646" LINK="http://environmentaldefence.ca/reports/11-million-litres-day-tar-sands-leaking-legacy" MODIFIED="1375464520646" TEXT="environmentaldefence.ca &gt; Reports &gt; 11-million-litres-day-tar-sands-leaking-legacy"/>
</node>
<node CREATED="1372801780586" ID="ID_80492243" MODIFIED="1372801803807" TEXT="Waste liquids being injected back into aquifers">
<node CREATED="1375460741633" LINK="http://www.pembina.org/pub/612" MODIFIED="1375460741633" TEXT="pembina.org &gt; Pub &gt; 612"/>
<node CREATED="1375464523779" LINK="http://environmentaldefence.ca/reports/11-million-litres-day-tar-sands-leaking-legacy" MODIFIED="1375464523779" TEXT="environmentaldefence.ca &gt; Reports &gt; 11-million-litres-day-tar-sands-leaking-legacy"/>
<node CREATED="1375465708305" LINK="http://www.water-matters.org/story/442" MODIFIED="1375465708305" TEXT="water-matters.org &gt; Story &gt; 442"/>
</node>
<node CREATED="1372801804270" ID="ID_576262462" MODIFIED="1372801814441" TEXT="Nuclear waste">
<node CREATED="1376055546309" LINK="http://dirtyoilsands.org/reports/carbon_copy_preventing_oil_sands_fever_in_saskatchewan" MODIFIED="1376055546309" TEXT="dirtyoilsands.org &gt; Reports &gt; Carbon copy preventing oil sands fever in saskatchewan"/>
</node>
<node CREATED="1372801107482" ID="ID_568462658" MODIFIED="1375204892885" TEXT="Consider the value of damage">
<node CREATED="1372801140858" ID="ID_4581277" MODIFIED="1372801140858" TEXT="to the environment">
<node CREATED="1375467767105" LINK="http://www.pembina.org/pub/1909" MODIFIED="1375467767105" TEXT="pembina.org &gt; Pub &gt; 1909"/>
</node>
<node CREATED="1372801152943" ID="ID_1742277237" MODIFIED="1372801154655" TEXT=" to species">
<node CREATED="1375465647695" ID="ID_1294197199" LINK="http://dirtyoilsands.org/reports/migration_of_whooping_cranes_grus_americana_through_albertas_bitumen_sands_" MODIFIED="1375465647695" TEXT="dirtyoilsands.org &gt; Reports &gt; Migration of whooping cranes grus americana through albertas bitumen sands "/>
</node>
</node>
<node CREATED="1372792564938" ID="ID_1113706246" MODIFIED="1375113855382" TEXT="Evidence of environmental damage, species degradation">
<node CREATED="1375465647695" ID="ID_917966038" LINK="http://dirtyoilsands.org/reports/migration_of_whooping_cranes_grus_americana_through_albertas_bitumen_sands_" MODIFIED="1375465647695" TEXT="dirtyoilsands.org &gt; Reports &gt; Migration of whooping cranes grus americana through albertas bitumen sands "/>
</node>
</node>
<node CREATED="1375206600236" ID="ID_1155129698" MODIFIED="1376056870022" TEXT="Negative growth">
<node CREATED="1372431916805" ID="ID_1123634828" MODIFIED="1375110244161" TEXT="Being forced to adapt to climate change">
<node CREATED="1376057450790" LINK="http://www.greenpeace.org/canada/en/campaigns/Energy/tarsands/Resources/Background-documents/Dirty-Oil-How-the-tar-sands-are-fueling-the-global-climate-crisis-/" MODIFIED="1376057450790" TEXT="greenpeace.org &gt; Canada &gt; En &gt; Campaigns &gt; Energy &gt; Tarsands &gt; Resources &gt; Background-documents &gt; Dirty-Oil-How-the-tar-sands-are-fueling-the-global-climate-crisis-"/>
</node>
<node CREATED="1375114936115" ID="ID_315264087" MODIFIED="1375114942107" TEXT="Growth of the tar sands">
<node CREATED="1376057152173" LINK="http://www.nrdc.org/energy/files/TarSandsInvasion-full.pdf" MODIFIED="1376057152173" TEXT="nrdc.org &gt; Energy &gt; Files &gt; TarSandsInvasion-full"/>
<node CREATED="1376057322275" LINK="http://environmentaldefence.ca/reports/11-million-litres-day-tar-sands-leaking-legacy" MODIFIED="1376057322275" TEXT="environmentaldefence.ca &gt; Reports &gt; 11-million-litres-day-tar-sands-leaking-legacy"/>
</node>
<node CREATED="1372794640472" ID="ID_745377818" MODIFIED="1375204173006" TEXT="Emissions growth, need for reduced emissions">
<node CREATED="1376057210208" LINK="http://corpethics.org/downloads/WEO2010%20Oil%20use%20must%20drop_%20Final%20Dec%202010.pdf" MODIFIED="1376057210208" TEXT="corpethics.org &gt; Downloads &gt; WEO2010 Oil use must drop  Final Dec 2010"/>
<node CREATED="1376057366873" LINK="http://environmentaldefence.ca/reports/canadas-toxic-tar-sands-most-destructive-project-earth" MODIFIED="1376057366873" TEXT="environmentaldefence.ca &gt; Reports &gt; Canadas-toxic-tar-sands-most-destructive-project-earth"/>
</node>
</node>
</node>
<node CREATED="1375202845374" ID="ID_1028184707" MODIFIED="1375202859524" TEXT="Negative impacts on humans">
<icon BUILTIN="stop"/>
<node CREATED="1372795151883" ID="ID_473782975" MODIFIED="1372795217961" TEXT="Negative impact on human health">
<node CREATED="1375998157453" ID="ID_615373283" LINK="http://environmentaldefence.ca/reports/dirty-oil-dirty-air-ottawas-broken-pollution-promise" MODIFIED="1375998157453" TEXT="environmentaldefence.ca &gt; Reports &gt; Dirty-oil-dirty-air-ottawas-broken-pollution-promise"/>
</node>
<node CREATED="1372795218280" ID="ID_318802067" MODIFIED="1375998200042" TEXT="Costs to public health ">
<node CREATED="1375474801426" LINK="http://www.nrdc.org/energy/files/TarSandsInvasion-full.pdf" MODIFIED="1375474801426" TEXT="nrdc.org &gt; Energy &gt; Files &gt; TarSandsInvasion-full"/>
<node CREATED="1375475388183" LINK="http://www.greenpeace.org.uk/media/reports/tar-sands-your-tank" MODIFIED="1375475388183" TEXT="greenpeace.org.uk &gt; Media &gt; Reports &gt; Tar-sands-your-tank"/>
</node>
<node CREATED="1375205121332" ID="ID_50441029" MODIFIED="1375205122378" TEXT="Risk">
<node CREATED="1372798505568" ID="ID_1819734331" MODIFIED="1372798526628" TEXT="To community health">
<node CREATED="1376057681905" LINK="http://forestethics.org/news/tar-sands-refineries-communities-risk" MODIFIED="1376057681905" TEXT="forestethics.org &gt; News &gt; Tar-sands-refineries-communities-risk"/>
</node>
<node CREATED="1372798526953" ID="ID_918060003" MODIFIED="1372798535723" TEXT="To human health">
<node CREATED="1376057561078" LINK="http://tarsandssolutions.org/publications/canadas-oil-sands---shrinking-window-of-opportunity" MODIFIED="1376057561078" TEXT="tarsandssolutions.org &gt; Publications &gt; Canadas-oil-sands---shrinking-window-of-opportunity"/>
<node CREATED="1376057719802" LINK="http://www.nrdc.org/energy/going-in-reverse.asp" MODIFIED="1376057719802" TEXT="nrdc.org &gt; Energy &gt; Going-in-reverse"/>
</node>
</node>
</node>
<node CREATED="1375204088585" ID="ID_1686075175" MODIFIED="1375204100497" TEXT="Negative impacts on the economy">
<icon BUILTIN="stop"/>
<node CREATED="1372791309022" ID="ID_1481058104" MODIFIED="1372791321329" TEXT="Dirty oil threatening the economy">
<node CREATED="1375466363518" LINK="http://www.nrdc.org/energy/files/TarSandsInvasion-full.pdf" MODIFIED="1375466363518" TEXT="nrdc.org &gt; Energy &gt; Files &gt; TarSandsInvasion-full"/>
</node>
<node CREATED="1372791321887" ID="ID_1428383091" MODIFIED="1372791351086" TEXT="Dependency on revenue from the oil sands is risky for the economy">
<node CREATED="1375466413799" LINK="http://www.nrdc.org/energy/files/TarSandsInvasion-full.pdf" MODIFIED="1375466413799" TEXT="nrdc.org &gt; Energy &gt; Files &gt; TarSandsInvasion-full"/>
</node>
<node CREATED="1372791381350" ID="ID_212808962" MODIFIED="1372791430587" TEXT="Environmental damage causing negative effects on the economy">
<node CREATED="1375466516767" LINK="http://www.nrdc.org/energy/going-in-reverse.asp" MODIFIED="1375466516767" TEXT="nrdc.org &gt; Energy &gt; Going-in-reverse"/>
<node CREATED="1375467305413" LINK="http://www.ilr.cornell.edu/globallaborinstitute/research/upload/GLI_KeystoneXL_Reportpdf.pdf" MODIFIED="1375467305413" TEXT="ilr.cornell.edu &gt; Globallaborinstitute &gt; Research &gt; Upload &gt; GLI KeystoneXL Reportpdf"/>
<node CREATED="1375467812232" LINK="http://www.pembina.org/pub/1909" MODIFIED="1375467812232" TEXT="pembina.org &gt; Pub &gt; 1909"/>
</node>
<node CREATED="1372798429523" ID="ID_891732467" MODIFIED="1372798433012" TEXT="Financial risk">
<node CREATED="1372798439544" ID="ID_1057934165" MODIFIED="1372798444826" TEXT="To Albertans">
<node CREATED="1375467373677" LINK="http://www.ilr.cornell.edu/globallaborinstitute/research/upload/GLI_KeystoneXL_Reportpdf.pdf" MODIFIED="1375467373677" TEXT="ilr.cornell.edu &gt; Globallaborinstitute &gt; Research &gt; Upload &gt; GLI KeystoneXL Reportpdf"/>
<node CREATED="1375467796232" LINK="http://www.pembina.org/pub/1909" MODIFIED="1375467796232" TEXT="pembina.org &gt; Pub &gt; 1909"/>
<node CREATED="1375469496432" LINK="http://www.pembina.org/pub/2404" MODIFIED="1375469496432" TEXT="pembina.org &gt; Pub &gt; 2404"/>
</node>
</node>
</node>
<node CREATED="1375201642498" ID="ID_1579274243" MODIFIED="1375201655379" TEXT="Monetary costs">
<icon BUILTIN="stop"/>
<node CREATED="1372786954454" ID="ID_297350916" MODIFIED="1372787005703" TEXT="Production costs">
<node CREATED="1375475033987" ID="ID_1437917177" LINK="http://www.boell.de/publications/publications-12097.html" MODIFIED="1375475033987">
<richcontent TYPE="NODE"><html>
  <head>
    
  </head>
  <body>
    <a href="http://www.boell.de/publications/publications-12097.html">http://www.boell.de/publications/publications-12097.html</a>
  </body>
</html></richcontent>
</node>
<node CREATED="1375475316031" LINK="http://www.greenpeace.org/canada/en/campaigns/Energy/tarsands/Resources/Reports/shellreport/" MODIFIED="1375475316031" TEXT="greenpeace.org &gt; Canada &gt; En &gt; Campaigns &gt; Energy &gt; Tarsands &gt; Resources &gt; Reports &gt; Shellreport"/>
</node>
<node CREATED="1372787015399" ID="ID_1298597445" MODIFIED="1375201678752" TEXT="Costs of clean-up, reclamation">
<node CREATED="1375467311368" LINK="http://www.ilr.cornell.edu/globallaborinstitute/research/upload/GLI_KeystoneXL_Reportpdf.pdf" MODIFIED="1375467311368" TEXT="ilr.cornell.edu &gt; Globallaborinstitute &gt; Research &gt; Upload &gt; GLI KeystoneXL Reportpdf"/>
<node CREATED="1375474903138" LINK="http://credbc.ca/assessing-the-risks/" MODIFIED="1375474903138" TEXT="credbc.ca &gt; Assessing-the-risks"/>
<node CREATED="1375475655186" LINK="http://www.nrdc.org/energy/going-in-reverse.asp" MODIFIED="1375475655186" TEXT="nrdc.org &gt; Energy &gt; Going-in-reverse"/>
</node>
<node CREATED="1372787032488" ID="ID_652346550" MODIFIED="1375201954638" TEXT="Operating costs, including labour and capital ">
<node CREATED="1375475853504" LINK="http://priceofoil.org/2013/01/17/petroleum-coke-the-coal-hiding-in-the-tar-sands/" MODIFIED="1375475853504" TEXT="priceofoil.org &gt; 2013 &gt; 01 &gt; 17 &gt; Petroleum-coke-the-coal-hiding-in-the-tar-sands"/>
<node CREATED="1375476055396" LINK="http://www.homelesshub.ca/library/taming-the-tempest-an-alternate-development-strategy-for-alberta-35394.aspx" MODIFIED="1375476055396" TEXT="homelesshub.ca &gt; Library &gt; Taming-the-tempest-an-alternate-development-strategy-for-alberta-35394"/>
<node CREATED="1375476637123" LINK="http://www.policyalternatives.ca/publications/reports/bitumen-cliff" MODIFIED="1375476637123" TEXT="policyalternatives.ca &gt; Publications &gt; Reports &gt; Bitumen-cliff"/>
</node>
<node CREATED="1372787043978" ID="ID_724599264" MODIFIED="1372787049639" TEXT="Opportunity cost">
<node CREATED="1375476688159" LINK="http://www.foei.org/en/resources/publications/pdfs/2010/tar-sands-fuelling-the-climate-crisis-undermining-eu-energy-security-and-damaging-development-objectives/view" MODIFIED="1375476688159" TEXT="foei.org &gt; En &gt; Resources &gt; Publications &gt; Pdfs &gt; 2010 &gt; Tar-sands-fuelling-the-climate-crisis-undermining-eu-energy-security-and-damaging-development-objectives &gt; View"/>
</node>
<node CREATED="1375201988299" ID="ID_962093816" MODIFIED="1375201999448" TEXT="Cost of Keystone XL">
<node CREATED="1375475205399" LINK="http://www.ilr.cornell.edu/globallaborinstitute/research/upload/GLI_KeystoneXL_Reportpdf.pdf" MODIFIED="1375475205399" TEXT="ilr.cornell.edu &gt; Globallaborinstitute &gt; Research &gt; Upload &gt; GLI KeystoneXL Reportpdf"/>
<node CREATED="1375475695256" LINK="http://www.nrdc.org/energy/keystone-pipeline/higher-oil-prices.asp" MODIFIED="1375475695256" TEXT="nrdc.org &gt; Energy &gt; Keystone-pipeline &gt; Higher-oil-prices"/>
</node>
</node>
<node CREATED="1375201796362" ID="ID_150906912" MODIFIED="1375201812692" TEXT="Consider alternative energy sources">
<icon BUILTIN="stop"/>
<node CREATED="1375201840772" ID="ID_1092047467" MODIFIED="1375201857782" TEXT="The monetary benefit of switching to an electric vehicle">
<node CREATED="1375998036282" LINK="http://www.nrdc.org/energy/files/TarSandsInvasion-full.pdf" MODIFIED="1375998036282" TEXT="nrdc.org &gt; Energy &gt; Files &gt; TarSandsInvasion-full"/>
</node>
<node CREATED="1372791448112" ID="ID_1580705744" MODIFIED="1372791512503" TEXT="Biofuel and other renewable energy boosting the economy">
<node CREATED="1375469564800" LINK="http://www.pembina.org/pub/2404" MODIFIED="1375469564800" TEXT="pembina.org &gt; Pub &gt; 2404"/>
</node>
<node CREATED="1372791513257" ID="ID_327872504" MODIFIED="1372791575816" TEXT="Green economy is stimulating growth">
<node CREATED="1375452407313" ID="ID_1303708752" LINK="http://bluegreencanada.ca/sites/default/files/resources/More%20Bang%20for%20Buck%20Nov%202012%20FINAL%20WEB.pdf" MODIFIED="1375452407313">
<richcontent TYPE="NODE"><html>
  <head>
    
  </head>
  <body>
    <a href="http://bluegreencanada.ca/sites/default/files/resources/More%20Bang%20for%20Buck%20Nov%202012%20FINAL%20WEB.pdf">http://bluegreencanada.ca/sites/default/files/resources/More%20Bang%20for%20Buck%20Nov%202012%20FINAL%20WEB.pdf</a>
  </body>
</html></richcontent>
</node>
<node CREATED="1375467422109" LINK="http://www.ilr.cornell.edu/globallaborinstitute/research/upload/GLI_KeystoneXL_Reportpdf.pdf" MODIFIED="1375467422109" TEXT="ilr.cornell.edu &gt; Globallaborinstitute &gt; Research &gt; Upload &gt; GLI KeystoneXL Reportpdf"/>
</node>
<node CREATED="1372791588269" ID="ID_202964872" MODIFIED="1372791650918" TEXT="Benefits of moving to low-carbon economy">
<node CREATED="1375467424352" LINK="http://www.ilr.cornell.edu/globallaborinstitute/research/upload/GLI_KeystoneXL_Reportpdf.pdf" MODIFIED="1375467424352" TEXT="ilr.cornell.edu &gt; Globallaborinstitute &gt; Research &gt; Upload &gt; GLI KeystoneXL Reportpdf"/>
<node CREATED="1375468746438" LINK="http://www.policyalternatives.ca/publications/reports/bitumen-cliff" MODIFIED="1375468746438" TEXT="policyalternatives.ca &gt; Publications &gt; Reports &gt; Bitumen-cliff"/>
</node>
<node CREATED="1372796555018" ID="ID_1516459818" MODIFIED="1375203581776" TEXT="Need to transition to clean energy">
<node CREATED="1375452407313" ID="ID_1213388905" LINK="http://bluegreencanada.ca/sites/default/files/resources/More%20Bang%20for%20Buck%20Nov%202012%20FINAL%20WEB.pdf" MODIFIED="1375452407313">
<richcontent TYPE="NODE"><html>
  <head>
    
  </head>
  <body>
    <a href="http://bluegreencanada.ca/sites/default/files/resources/More%20Bang%20for%20Buck%20Nov%202012%20FINAL%20WEB.pdf">http://bluegreencanada.ca/sites/default/files/resources/More%20Bang%20for%20Buck%20Nov%202012%20FINAL%20WEB.pdf</a>
  </body>
</html></richcontent>
</node>
<node CREATED="1375468128503" LINK="http://dirtyoilsands.org/reports/toxic_trail_exposure_youth_delegation_tracks_tar_sands_in_great_lakes_regio" MODIFIED="1375468128503" TEXT="dirtyoilsands.org &gt; Reports &gt; Toxic trail exposure youth delegation tracks tar sands in great lakes regio"/>
</node>
<node CREATED="1372796797755" ID="ID_1811593846" MODIFIED="1375203642292" TEXT="Need to transition away from oil, and reduce our dependency on oil">
<node CREATED="1375468573165" LINK="http://www.policyalternatives.ca/publications/reports/bitumen-cliff" MODIFIED="1375468573165" TEXT="policyalternatives.ca &gt; Publications &gt; Reports &gt; Bitumen-cliff"/>
<node CREATED="1375468864429" LINK="http://www.foei.org/en/resources/publications/pdfs/2010/tar-sands-fuelling-the-climate-crisis-undermining-eu-energy-security-and-damaging-development-objectives/view" MODIFIED="1375468864429" TEXT="foei.org &gt; En &gt; Resources &gt; Publications &gt; Pdfs &gt; 2010 &gt; Tar-sands-fuelling-the-climate-crisis-undermining-eu-energy-security-and-damaging-development-objectives &gt; View"/>
</node>
</node>
<node CREATED="1375202916181" ID="ID_205041635" MODIFIED="1375203047259" TEXT="Consider the bias">
<icon BUILTIN="stop"/>
<node CREATED="1372785510027" ID="ID_1229542662" MODIFIED="1372785537949" TEXT="Institutional policy and legislation favours industry">
<node CREATED="1375464443890" LINK="http://environmentaldefence.ca/reports/just-visiting-stephen-harpers-climate-insincerity" MODIFIED="1375464443890" TEXT="environmentaldefence.ca &gt; Reports &gt; Just-visiting-stephen-harpers-climate-insincerity"/>
</node>
<node CREATED="1372796179440" ID="ID_1681001767" MODIFIED="1372796206960" TEXT="Industry aiming to maximize production, profit, revenues">
<node CREATED="1375468687426" LINK="http://www.policyalternatives.ca/publications/reports/bitumen-cliff" MODIFIED="1375468687426" TEXT="policyalternatives.ca &gt; Publications &gt; Reports &gt; Bitumen-cliff"/>
</node>
<node CREATED="1372791263429" ID="ID_1581947446" MODIFIED="1372791307170" TEXT="Choosing between environment or the economy">
<node CREATED="1375464440817" LINK="http://environmentaldefence.ca/reports/just-visiting-stephen-harpers-climate-insincerity" MODIFIED="1375464440817" TEXT="environmentaldefence.ca &gt; Reports &gt; Just-visiting-stephen-harpers-climate-insincerity"/>
<node CREATED="1375466276089" LINK="http://bluegreencanada.ca/sites/default/files/resources/More%20Bang%20for%20Buck%20Nov%202012%20FINAL%20WEB.pdf" MODIFIED="1375466276089">
<richcontent TYPE="NODE"><html>
  <head>
    
  </head>
  <body>
    <a href="http://bluegreencanada.ca/sites/default/files/resources/More%20Bang%20for%20Buck%20Nov%202012%20FINAL%20WEB.pdf">http://bluegreencanada.ca/sites/default/files/resources/More%20Bang%20for%20Buck%20Nov%202012%20FINAL%20WEB.pdf</a>
  </body>
</html></richcontent>
</node>
</node>
</node>
</node>
<node CREATED="1375108087341" HGAP="-10" ID="ID_530694761" MODIFIED="1375205531897" POSITION="left" TEXT="Industry Perspective" VSHIFT="306">
<node CREATED="1371222961674" ID="ID_62912002" MODIFIED="1375114276290" TEXT="Opportunities for First Nations">
<icon BUILTIN="go"/>
<node CREATED="1372420908757" ID="ID_342498486" MODIFIED="1376067053647" TEXT="Aboriginal participation">
<node CREATED="1376066156236" ID="ID_571832256" LINK="http://www.cnrl.com/corporate-responsibility/stewardship-report.html" MODIFIED="1376066156236" TEXT="cnrl.com &gt; Corporate-responsibility &gt; Stewardship-report"/>
<node CREATED="1376066333000" ID="ID_845230227" LINK="http://www.cnrl.com/investor-information/financial-information/financial-reports/annual-report.html" MODIFIED="1376066333000" TEXT="cnrl.com &gt; Investor-information &gt; Financial-information &gt; Financial-reports &gt; Annual-report"/>
<node CREATED="1376066876099" LINK="http://www.mining.ca/site/index.php/en/news-a-media/publications.html" MODIFIED="1376066876099" TEXT="mining.ca &gt; Site &gt; Index.php &gt; En &gt; News-a-media &gt; Publications"/>
<node CREATED="1376067054357" LINK="http://www.mining.ca/site/index.php/en/towards-sustainable-mining/community-of-interest-advisory-panel.html?fuseaction=media_lib.get&amp;media_id=416" MODIFIED="1376067054357" TEXT="mining.ca &gt; Site &gt; Index.php &gt; En &gt; Towards-sustainable-mining &gt; Community-of-interest-advisory-panel ? ..."/>
</node>
<node CREATED="1372420933122" ID="ID_12859407" MODIFIED="1376066443680" TEXT="Aboriginal employment">
<node CREATED="1376066335584" LINK="http://www.cnrl.com/investor-information/financial-information/financial-reports/annual-report.html" MODIFIED="1376066335584" TEXT="cnrl.com &gt; Investor-information &gt; Financial-information &gt; Financial-reports &gt; Annual-report"/>
<node CREATED="1376066445116" LINK="http://www.capp.ca/getdoc.aspx?DocId=180076" MODIFIED="1376066445116" TEXT="capp.ca &gt; Getdoc ? ..."/>
</node>
<node CREATED="1372420941371" ID="ID_1306940143" MODIFIED="1372421008361" TEXT="Aboriginal business">
<node CREATED="1376066156236" ID="ID_237804354" LINK="http://www.cnrl.com/corporate-responsibility/stewardship-report.html" MODIFIED="1376066156236" TEXT="cnrl.com &gt; Corporate-responsibility &gt; Stewardship-report"/>
</node>
</node>
<node CREATED="1375110365259" ID="ID_139402018" MODIFIED="1375110472708" TEXT="Commitment to managing environmental damage">
<icon BUILTIN="go"/>
<node CREATED="1375207648856" ID="ID_594860203" MODIFIED="1375207650234" TEXT="Waste">
<node CREATED="1375199259902" ID="ID_1520252876" MODIFIED="1375199303662" TEXT="Waste management">
<node CREATED="1376067710164" ID="ID_807077675" LINK="http://www.mining.ca/site/index.php/en/news-a-media/publications.html" MODIFIED="1376067710164" TEXT="mining.ca &gt; Site &gt; Index.php &gt; En &gt; News-a-media &gt; Publications"/>
<node CREATED="1376068077442" LINK="http://www.cnrl.com/investor-information/financial-information/financial-reports/annual-report.html" MODIFIED="1376068077442" TEXT="cnrl.com &gt; Investor-information &gt; Financial-information &gt; Financial-reports &gt; Annual-report"/>
</node>
<node CREATED="1372429921707" ID="ID_366962598" MODIFIED="1372429941751" TEXT="Tailings and mine waste">
<node CREATED="1371223042758" ID="ID_1279218480" MODIFIED="1371223051025" TEXT="Commitment to reclamation">
<node CREATED="1376068013607" ID="ID_1123298018" LINK="http://www.capp.ca/library/publications/crudeOilAndOilSands/pages/pubInfo.aspx?DocId=121342" MODIFIED="1376068013607" TEXT="capp.ca &gt; Library &gt; Publications &gt; CrudeOilAndOilSands &gt; Pages &gt; PubInfo ? ..."/>
<node CREATED="1376068687486" LINK="http://www.mining.ca/site/index.php/en/news-a-media/publications.html" MODIFIED="1376068687486" TEXT="mining.ca &gt; Site &gt; Index.php &gt; En &gt; News-a-media &gt; Publications"/>
</node>
</node>
</node>
<node CREATED="1375207659767" ID="ID_1142580070" MODIFIED="1375207660953" TEXT="Water">
<node CREATED="1375110946286" ID="ID_51572722" MODIFIED="1375110958546" TEXT="Reducing water use in the Athabasca region">
<node CREATED="1376070124930" LINK="http://www.mining.ca/site/index.php/en/news-a-media/publications.html" MODIFIED="1376070124930" TEXT="mining.ca &gt; Site &gt; Index.php &gt; En &gt; News-a-media &gt; Publications"/>
</node>
<node CREATED="1372868731028" ID="ID_1225232846" MODIFIED="1376069837013" TEXT="Minimize impacts on aquatics, biodiversity">
<node CREATED="1376069349105" ID="ID_901993543" LINK="http://www.mining.ca/site/index.php/en/news-a-media/publications.html" MODIFIED="1376069349105" TEXT="mining.ca &gt; Site &gt; Index.php &gt; En &gt; News-a-media &gt; Publications"/>
<node CREATED="1376069838264" LINK="http://www.mining.ca/site/index.php/en/towards-sustainable-mining/community-of-interest-advisory-panel.html?fuseaction=media_lib.get&amp;media_id=416" MODIFIED="1376069838264" TEXT="mining.ca &gt; Site &gt; Index.php &gt; En &gt; Towards-sustainable-mining &gt; Community-of-interest-advisory-panel ? ..."/>
</node>
<node CREATED="1372868651635" ID="ID_586404901" MODIFIED="1375195379444" TEXT="Maximize water recycling">
<node CREATED="1376069349105" ID="ID_809747043" LINK="http://www.mining.ca/site/index.php/en/news-a-media/publications.html" MODIFIED="1376069349105" TEXT="mining.ca &gt; Site &gt; Index.php &gt; En &gt; News-a-media &gt; Publications"/>
</node>
<node CREATED="1375197499292" ID="ID_1785187139" MODIFIED="1375197540843" TEXT="Consideration of water and air quality">
<node CREATED="1376069146735" ID="ID_113995765" LINK="http://www.mining.ca/site/index.php/en/towards-sustainable-mining/community-of-interest-advisory-panel.html?fuseaction=media_lib.get&amp;media_id=416" MODIFIED="1376069146735" TEXT="mining.ca &gt; Site &gt; Index.php &gt; En &gt; Towards-sustainable-mining &gt; Community-of-interest-advisory-panel ? ..."/>
<node CREATED="1376069349105" ID="ID_422237936" LINK="http://www.mining.ca/site/index.php/en/news-a-media/publications.html" MODIFIED="1376069349105" TEXT="mining.ca &gt; Site &gt; Index.php &gt; En &gt; News-a-media &gt; Publications"/>
</node>
</node>
<node CREATED="1375207666787" ID="ID_1365927336" MODIFIED="1375207772227" TEXT="Environment">
<node CREATED="1372866695399" ID="ID_892695777" MODIFIED="1372866703983" TEXT="Protecting the environment">
<node CREATED="1376069349105" ID="ID_875454930" LINK="http://www.mining.ca/site/index.php/en/news-a-media/publications.html" MODIFIED="1376069349105" TEXT="mining.ca &gt; Site &gt; Index.php &gt; En &gt; News-a-media &gt; Publications"/>
<node CREATED="1376073653171" LINK="http://www.cnrl.com/investor-information/financial-information/financial-reports/annual-report.html" MODIFIED="1376073653171">
<richcontent TYPE="NODE"><html>
  <head>
    
  </head>
  <body>
    <a href="http://www.cnrl.com/investor-information/financial-information/financial-reports/annual-report.html">http://www.cnrl.com/investor-information/financial-information/financial-reports/annual-report.html</a>
  </body>
</html></richcontent>
</node>
</node>
<node CREATED="1375114713889" ID="ID_499570930" MODIFIED="1376318213457" TEXT="Commitment to reducing industry&apos;s footprint">
<node CREATED="1376317342442" ID="ID_1684382672" LINK="http://www.mining.ca/site/index.php/en/news-a-media/publications.html" MODIFIED="1376317342442" TEXT="mining.ca &gt; Site &gt; Index.php &gt; En &gt; News-a-media &gt; Publications"/>
<node CREATED="1376318213921" LINK="http://www.capp.ca/canadaIndustry/oilSands/Dialogue-Resources/US/Pages/default.aspx" MODIFIED="1376318213921" TEXT="capp.ca &gt; CanadaIndustry &gt; OilSands &gt; Dialogue-Resources &gt; US &gt; Pages &gt; Default"/>
<node CREATED="1376318272907" LINK="http://www.capp.ca/getdoc.aspx?DocId=180076" MODIFIED="1376318272907" TEXT="capp.ca &gt; Getdoc ? ..."/>
<node CREATED="1376318347936" LINK="http://www.cnrl.com/investor-information/financial-information/financial-reports/annual-report.html" MODIFIED="1376318347936" TEXT="cnrl.com &gt; Investor-information &gt; Financial-information &gt; Financial-reports &gt; Annual-report"/>
</node>
<node CREATED="1375136027846" ID="ID_1267688100" MODIFIED="1375136060296" TEXT="Considering health of ecosystems">
<node CREATED="1376069349105" ID="ID_291496380" LINK="http://www.mining.ca/site/index.php/en/news-a-media/publications.html" MODIFIED="1376069349105" TEXT="mining.ca &gt; Site &gt; Index.php &gt; En &gt; News-a-media &gt; Publications"/>
</node>
<node CREATED="1372868723701" ID="ID_1043841342" MODIFIED="1375195307053" TEXT="Minimize environmental impacts">
<node CREATED="1376073356249" LINK="http://www.mining.ca/www/media_lib/MAC_Documents/Publications/2012/CSRAccountabilityReport2012.pdf" MODIFIED="1376073356249" TEXT="mining.ca &gt; Www &gt; Media lib &gt; MAC Documents &gt; Publications &gt; 2012 &gt; CSRAccountabilityReport2012"/>
</node>
</node>
<node CREATED="1375207669576" ID="ID_649551081" MODIFIED="1375207671339" TEXT="Air">
<node CREATED="1375110435780" ID="ID_1156491171" MODIFIED="1375110460476" TEXT="Manage and monitor air quality">
<node CREATED="1376320899645" ID="ID_1199937611" LINK="http://www.mining.ca/site/index.php/en/news-a-media/publications.html" MODIFIED="1376320899645" TEXT="mining.ca &gt; Site &gt; Index.php &gt; En &gt; News-a-media &gt; Publications"/>
<node CREATED="1376322121774" ID="ID_476213951" LINK="http://www.cnrl.com/corporate-responsibility/stewardship-report.html" MODIFIED="1376322121774" TEXT="cnrl.com &gt; Corporate-responsibility &gt; Stewardship-report"/>
</node>
</node>
</node>
<node CREATED="1375111336913" ID="ID_1362656024" MODIFIED="1375135026535" TEXT="Monetary and economic benefits">
<icon BUILTIN="go"/>
<node CREATED="1375133447694" ID="ID_1879768846" MODIFIED="1375133454922" TEXT="Avoid losing money">
<node CREATED="1376422184855" ID="ID_1431647150" LINK="http://www.cnrl.com/investor-information/financial-information/financial-reports/annual-report.html" MODIFIED="1376422184855" TEXT="cnrl.com &gt; Investor-information &gt; Financial-information &gt; Financial-reports &gt; Annual-report"/>
<node CREATED="1376422218401" ID="ID_1966325653" LINK="http://www.capp.ca/library/publications/crudeOilAndOilSands/pages/pubInfo.aspx?DocId=121342" MODIFIED="1376422218401" TEXT="capp.ca &gt; Library &gt; Publications &gt; CrudeOilAndOilSands &gt; Pages &gt; PubInfo ? ..."/>
</node>
<node CREATED="1372805813618" ID="ID_1668905611" MODIFIED="1372805881649" TEXT="Companies benefit from">
<node CREATED="1372805882445" ID="ID_54962395" MODIFIED="1372805889086" TEXT="lower royalty rates">
<node CREATED="1376422184855" ID="ID_1360676874" LINK="http://www.cnrl.com/investor-information/financial-information/financial-reports/annual-report.html" MODIFIED="1376422184855" TEXT="cnrl.com &gt; Investor-information &gt; Financial-information &gt; Financial-reports &gt; Annual-report"/>
</node>
<node CREATED="1372805889702" ID="ID_1080699094" MODIFIED="1372805906488" TEXT="lower interest rates">
<node CREATED="1376422184855" ID="ID_366215995" LINK="http://www.cnrl.com/investor-information/financial-information/financial-reports/annual-report.html" MODIFIED="1376422184855" TEXT="cnrl.com &gt; Investor-information &gt; Financial-information &gt; Financial-reports &gt; Annual-report"/>
<node CREATED="1376422218401" ID="ID_1448237335" LINK="http://www.capp.ca/library/publications/crudeOilAndOilSands/pages/pubInfo.aspx?DocId=121342" MODIFIED="1376422218401" TEXT="capp.ca &gt; Library &gt; Publications &gt; CrudeOilAndOilSands &gt; Pages &gt; PubInfo ? ..."/>
</node>
</node>
<node CREATED="1372868116643" ID="ID_81087211" MODIFIED="1372868141711" TEXT="Contribution to economic growth">
<node CREATED="1376422184855" ID="ID_1596497867" LINK="http://www.cnrl.com/investor-information/financial-information/financial-reports/annual-report.html" MODIFIED="1376422184855" TEXT="cnrl.com &gt; Investor-information &gt; Financial-information &gt; Financial-reports &gt; Annual-report"/>
<node CREATED="1376422218401" ID="ID_1588156150" LINK="http://www.capp.ca/library/publications/crudeOilAndOilSands/pages/pubInfo.aspx?DocId=121342" MODIFIED="1376422218401" TEXT="capp.ca &gt; Library &gt; Publications &gt; CrudeOilAndOilSands &gt; Pages &gt; PubInfo ? ..."/>
<node CREATED="1376069349105" ID="ID_1524111319" LINK="http://www.mining.ca/site/index.php/en/news-a-media/publications.html" MODIFIED="1376069349105" TEXT="mining.ca &gt; Site &gt; Index.php &gt; En &gt; News-a-media &gt; Publications"/>
</node>
<node CREATED="1372868237294" ID="ID_1670882618" MODIFIED="1372884662884" TEXT="&apos;Profitable growth&apos;">
<node CREATED="1376422184855" ID="ID_1587107793" LINK="http://www.cnrl.com/investor-information/financial-information/financial-reports/annual-report.html" MODIFIED="1376422184855" TEXT="cnrl.com &gt; Investor-information &gt; Financial-information &gt; Financial-reports &gt; Annual-report"/>
<node CREATED="1376422218401" ID="ID_1265154275" LINK="http://www.capp.ca/library/publications/crudeOilAndOilSands/pages/pubInfo.aspx?DocId=121342" MODIFIED="1376422218401" TEXT="capp.ca &gt; Library &gt; Publications &gt; CrudeOilAndOilSands &gt; Pages &gt; PubInfo ? ..."/>
<node CREATED="1376069349105" ID="ID_452624030" LINK="http://www.mining.ca/site/index.php/en/news-a-media/publications.html" MODIFIED="1376069349105" TEXT="mining.ca &gt; Site &gt; Index.php &gt; En &gt; News-a-media &gt; Publications"/>
</node>
<node CREATED="1372871063215" ID="ID_1455062541" MODIFIED="1375198850537" TEXT="Value in oil and reserves">
<node CREATED="1376071521619" ID="ID_751318130" LINK="http://www.mining.ca/site/index.php/en/towards-sustainable-mining/community-of-interest-advisory-panel.html?fuseaction=media_lib.get&amp;media_id=416" MODIFIED="1376071521619" TEXT="mining.ca &gt; Site &gt; Index.php &gt; En &gt; Towards-sustainable-mining &gt; Community-of-interest-advisory-panel ? ..."/>
</node>
<node CREATED="1372871070171" ID="ID_1171736241" MODIFIED="1375198857985" TEXT="Value-added and value-processing">
<node CREATED="1376323618590" ID="ID_951931807" LINK="http://www.mining.ca/site/index.php/en/news-a-media/publications.html" MODIFIED="1376323618590" TEXT="mining.ca &gt; Site &gt; Index.php &gt; En &gt; News-a-media &gt; Publications"/>
</node>
<node CREATED="1372871084932" ID="ID_461950874" MODIFIED="1372871104358" TEXT="Shareholder value">
<node CREATED="1376071548035" ID="ID_1489056525" LINK="http://www.capp.ca/library/publications/crudeOilAndOilSands/pages/pubInfo.aspx?DocId=121342" MODIFIED="1376071548035" TEXT="capp.ca &gt; Library &gt; Publications &gt; CrudeOilAndOilSands &gt; Pages &gt; PubInfo ? ..."/>
<node CREATED="1376323618590" ID="ID_90905766" LINK="http://www.mining.ca/site/index.php/en/news-a-media/publications.html" MODIFIED="1376323618590" TEXT="mining.ca &gt; Site &gt; Index.php &gt; En &gt; News-a-media &gt; Publications"/>
</node>
</node>
<node CREATED="1375133312840" ID="ID_1847782829" MODIFIED="1375134177506" TEXT="Reasons for expanding development and production">
<icon BUILTIN="go"/>
<node CREATED="1372867119176" ID="ID_1052052578" MODIFIED="1376079731819" TEXT="Evidence that oil sands are not a threat to the aquatic ecosystem">
<node CREATED="1376079699617" ID="ID_169780106" LINK="http://www.capp.ca/UpstreamDialogue/OilSands/Pages/default.aspx" MODIFIED="1376079699617">
<richcontent TYPE="NODE"><html>
  <head>
    
  </head>
  <body>
    <a href="http://www.capp.ca/UpstreamDialogue/OilSands/Pages/default.aspx">http://www.capp.ca/UpstreamDialogue/OilSands/Pages/default.aspx</a>
  </body>
</html></richcontent>
</node>
<node CREATED="1376079732391" ID="ID_407834011" LINK="http://www.capp.ca/canadaIndustry/oilSands/Dialogue-Resources/US/Pages/default.aspx" MODIFIED="1376079732391" TEXT="capp.ca &gt; CanadaIndustry &gt; OilSands &gt; Dialogue-Resources &gt; US &gt; Pages &gt; Default"/>
</node>
<node CREATED="1375207916168" ID="ID_1948972627" MODIFIED="1375207922290" TEXT="Low risk">
<node CREATED="1375134513363" ID="ID_825201200" MODIFIED="1376424476364" TEXT="Acceptable financial risk">
<node CREATED="1376422184855" ID="ID_1986653925" LINK="http://www.cnrl.com/investor-information/financial-information/financial-reports/annual-report.html" MODIFIED="1376422184855" TEXT="cnrl.com &gt; Investor-information &gt; Financial-information &gt; Financial-reports &gt; Annual-report"/>
</node>
<node CREATED="1375197689477" ID="ID_1162614670" MODIFIED="1375197691580" TEXT="Low risk exploitation ">
<node CREATED="1376422184855" ID="ID_1969089220" LINK="http://www.cnrl.com/investor-information/financial-information/financial-reports/annual-report.html" MODIFIED="1376422184855" TEXT="cnrl.com &gt; Investor-information &gt; Financial-information &gt; Financial-reports &gt; Annual-report"/>
</node>
<node CREATED="1375196227142" ID="ID_193481422" MODIFIED="1375196251407" TEXT="Industry will minimize risks and incidents">
<node CREATED="1376323620629" LINK="http://www.mining.ca/site/index.php/en/news-a-media/publications.html" MODIFIED="1376323620629" TEXT="mining.ca &gt; Site &gt; Index.php &gt; En &gt; News-a-media &gt; Publications"/>
<node CREATED="1376422184855" ID="ID_1812605376" LINK="http://www.cnrl.com/investor-information/financial-information/financial-reports/annual-report.html" MODIFIED="1376422184855" TEXT="cnrl.com &gt; Investor-information &gt; Financial-information &gt; Financial-reports &gt; Annual-report"/>
<node CREATED="1376422218401" ID="ID_1183098308" LINK="http://www.capp.ca/library/publications/crudeOilAndOilSands/pages/pubInfo.aspx?DocId=121342" MODIFIED="1376422218401" TEXT="capp.ca &gt; Library &gt; Publications &gt; CrudeOilAndOilSands &gt; Pages &gt; PubInfo ? ..."/>
</node>
<node CREATED="1375197707745" ID="ID_748064011" MODIFIED="1375197725279" TEXT="Industry has risk assessments">
<node CREATED="1376323618590" ID="ID_1637454419" LINK="http://www.mining.ca/site/index.php/en/news-a-media/publications.html" MODIFIED="1376323618590" TEXT="mining.ca &gt; Site &gt; Index.php &gt; En &gt; News-a-media &gt; Publications"/>
<node CREATED="1376422184855" ID="ID_1618100376" LINK="http://www.cnrl.com/investor-information/financial-information/financial-reports/annual-report.html" MODIFIED="1376422184855" TEXT="cnrl.com &gt; Investor-information &gt; Financial-information &gt; Financial-reports &gt; Annual-report"/>
<node CREATED="1376422218401" ID="ID_1568621751" LINK="http://www.capp.ca/library/publications/crudeOilAndOilSands/pages/pubInfo.aspx?DocId=121342" MODIFIED="1376422218401" TEXT="capp.ca &gt; Library &gt; Publications &gt; CrudeOilAndOilSands &gt; Pages &gt; PubInfo ? ..."/>
</node>
</node>
<node CREATED="1375207956189" ID="ID_1180050149" MODIFIED="1375207963794" TEXT="Efficiency">
<node CREATED="1372868658146" ID="ID_1956689857" MODIFIED="1375196814441" TEXT="Industry makes efforts to maximize efficiency and utilization of production facilities ">
<node CREATED="1376436169379" ID="ID_622997555" LINK="http://www.mining.ca/site/index.php/en/towards-sustainable-mining/community-of-interest-advisory-panel.html?fuseaction=media_lib.get&amp;media_id=416" MODIFIED="1376436169379" TEXT="mining.ca &gt; Site &gt; Index.php &gt; En &gt; Towards-sustainable-mining &gt; Community-of-interest-advisory-panel ? ..."/>
<node CREATED="1376422184855" ID="ID_1787358426" LINK="http://www.cnrl.com/investor-information/financial-information/financial-reports/annual-report.html" MODIFIED="1376422184855" TEXT="cnrl.com &gt; Investor-information &gt; Financial-information &gt; Financial-reports &gt; Annual-report"/>
</node>
<node CREATED="1375196023544" ID="ID_1688496900" MODIFIED="1375196145670" TEXT="Industry will maximize resource recovery and minimize costs">
<node CREATED="1376422184855" ID="ID_752260871" LINK="http://www.cnrl.com/investor-information/financial-information/financial-reports/annual-report.html" MODIFIED="1376422184855" TEXT="cnrl.com &gt; Investor-information &gt; Financial-information &gt; Financial-reports &gt; Annual-report"/>
</node>
<node CREATED="1375196954901" ID="ID_745901840" MODIFIED="1375196964554" TEXT="Industry aims to achieve performance improvements ">
<node CREATED="1376437159830" LINK="http://www.mining.ca/site/index.php/en/towards-sustainable-mining/community-of-interest-advisory-panel.html?fuseaction=media_lib.get&amp;media_id=416" MODIFIED="1376437159830">
<richcontent TYPE="NODE"><html>
  <head>
    
  </head>
  <body>
    <a href="http://www.mining.ca/site/index.php/en/towards-sustainable-mining/community-of-interest-advisory-panel.html?fuseaction=media_lib.get&amp;media_id=416">http://www.mining.ca/site/index.php/en/towards-sustainable-mining/community-of-interest-advisory-panel.html?fuseaction=media_lib.get&amp;media_id=416</a>
  </body>
</html></richcontent>
</node>
<node CREATED="1376323618590" ID="ID_1608269498" LINK="http://www.mining.ca/site/index.php/en/news-a-media/publications.html" MODIFIED="1376323618590" TEXT="mining.ca &gt; Site &gt; Index.php &gt; En &gt; News-a-media &gt; Publications"/>
<node CREATED="1376422184855" ID="ID_1072530067" LINK="http://www.cnrl.com/investor-information/financial-information/financial-reports/annual-report.html" MODIFIED="1376422184855" TEXT="cnrl.com &gt; Investor-information &gt; Financial-information &gt; Financial-reports &gt; Annual-report"/>
<node CREATED="1376422218401" ID="ID_451044233" LINK="http://www.capp.ca/library/publications/crudeOilAndOilSands/pages/pubInfo.aspx?DocId=121342" MODIFIED="1376422218401" TEXT="capp.ca &gt; Library &gt; Publications &gt; CrudeOilAndOilSands &gt; Pages &gt; PubInfo ? ..."/>
</node>
</node>
<node CREATED="1375207964193" ID="ID_232681947" MODIFIED="1375207965774" TEXT="Control">
<node CREATED="1375134579244" ID="ID_663617937" MODIFIED="1376437533945" TEXT="Ability to adapt to changing markets and conditions">
<node CREATED="1376422184855" ID="ID_1313370777" LINK="http://www.cnrl.com/investor-information/financial-information/financial-reports/annual-report.html" MODIFIED="1376422184855" TEXT="cnrl.com &gt; Investor-information &gt; Financial-information &gt; Financial-reports &gt; Annual-report"/>
<node CREATED="1376437538591" ID="ID_1976087319" LINK="http://www.cnrl.com/investor-information/financial-information/financial-reports/quarterly-reports.html" MODIFIED="1376437538591" TEXT="cnrl.com &gt; Investor-information &gt; Financial-information &gt; Financial-reports &gt; Quarterly-reports"/>
</node>
<node CREATED="1372868199282" ID="ID_467501351" MODIFIED="1375135974611" TEXT="Industry has a defined growth strategy">
<node CREATED="1376422184855" ID="ID_1459864240" LINK="http://www.cnrl.com/investor-information/financial-information/financial-reports/annual-report.html" MODIFIED="1376422184855" TEXT="cnrl.com &gt; Investor-information &gt; Financial-information &gt; Financial-reports &gt; Annual-report"/>
<node CREATED="1376437538591" ID="ID_1115962347" LINK="http://www.cnrl.com/investor-information/financial-information/financial-reports/quarterly-reports.html" MODIFIED="1376437538591" TEXT="cnrl.com &gt; Investor-information &gt; Financial-information &gt; Financial-reports &gt; Quarterly-reports"/>
</node>
<node CREATED="1372806291428" ID="ID_277210843" MODIFIED="1375135752906" TEXT="Industry has control over production, transportation and financial reporting">
<node CREATED="1376422184855" ID="ID_771975057" LINK="http://www.cnrl.com/investor-information/financial-information/financial-reports/annual-report.html" MODIFIED="1376422184855" TEXT="cnrl.com &gt; Investor-information &gt; Financial-information &gt; Financial-reports &gt; Annual-report"/>
<node CREATED="1376437538591" ID="ID_597349010" LINK="http://www.cnrl.com/investor-information/financial-information/financial-reports/quarterly-reports.html" MODIFIED="1376437538591" TEXT="cnrl.com &gt; Investor-information &gt; Financial-information &gt; Financial-reports &gt; Quarterly-reports"/>
<node CREATED="1376422218401" ID="ID_341509565" LINK="http://www.capp.ca/library/publications/crudeOilAndOilSands/pages/pubInfo.aspx?DocId=121342" MODIFIED="1376422218401" TEXT="capp.ca &gt; Library &gt; Publications &gt; CrudeOilAndOilSands &gt; Pages &gt; PubInfo ? ..."/>
<node CREATED="1376323618590" ID="ID_865398911" LINK="http://www.mining.ca/site/index.php/en/news-a-media/publications.html" MODIFIED="1376323618590" TEXT="mining.ca &gt; Site &gt; Index.php &gt; En &gt; News-a-media &gt; Publications"/>
</node>
<node CREATED="1375197284305" ID="ID_1360272244" MODIFIED="1375197310212" TEXT="Industry has performance measures, assessments and indicators">
<node CREATED="1376422184855" ID="ID_1571312890" LINK="http://www.cnrl.com/investor-information/financial-information/financial-reports/annual-report.html" MODIFIED="1376422184855" TEXT="cnrl.com &gt; Investor-information &gt; Financial-information &gt; Financial-reports &gt; Annual-report"/>
<node CREATED="1376437538591" ID="ID_706151270" LINK="http://www.cnrl.com/investor-information/financial-information/financial-reports/quarterly-reports.html" MODIFIED="1376437538591" TEXT="cnrl.com &gt; Investor-information &gt; Financial-information &gt; Financial-reports &gt; Quarterly-reports"/>
<node CREATED="1376422218401" ID="ID_1350949477" LINK="http://www.capp.ca/library/publications/crudeOilAndOilSands/pages/pubInfo.aspx?DocId=121342" MODIFIED="1376422218401" TEXT="capp.ca &gt; Library &gt; Publications &gt; CrudeOilAndOilSands &gt; Pages &gt; PubInfo ? ..."/>
<node CREATED="1376323618590" ID="ID_1042596776" LINK="http://www.mining.ca/site/index.php/en/news-a-media/publications.html" MODIFIED="1376323618590" TEXT="mining.ca &gt; Site &gt; Index.php &gt; En &gt; News-a-media &gt; Publications"/>
</node>
<node CREATED="1372806412065" ID="ID_1886353823" MODIFIED="1372806425678" TEXT="Cost control">
<node CREATED="1376422184855" ID="ID_893645729" LINK="http://www.cnrl.com/investor-information/financial-information/financial-reports/annual-report.html" MODIFIED="1376422184855" TEXT="cnrl.com &gt; Investor-information &gt; Financial-information &gt; Financial-reports &gt; Annual-report"/>
<node CREATED="1376437538591" ID="ID_108130704" LINK="http://www.cnrl.com/investor-information/financial-information/financial-reports/quarterly-reports.html" MODIFIED="1376437538591" TEXT="cnrl.com &gt; Investor-information &gt; Financial-information &gt; Financial-reports &gt; Quarterly-reports"/>
</node>
</node>
</node>
<node CREATED="1375195530420" ID="ID_584174034" MODIFIED="1375195553315" TEXT="Positive elements of development, growth, and production">
<icon BUILTIN="go"/>
<node CREATED="1375135764570" ID="ID_84821558" MODIFIED="1375135787431" TEXT="Develop partnerships with stakeholders">
<node CREATED="1376323618590" ID="ID_97956288" LINK="http://www.mining.ca/site/index.php/en/news-a-media/publications.html" MODIFIED="1376323618590" TEXT="mining.ca &gt; Site &gt; Index.php &gt; En &gt; News-a-media &gt; Publications"/>
<node CREATED="1376422184855" ID="ID_54149434" LINK="http://www.cnrl.com/investor-information/financial-information/financial-reports/annual-report.html" MODIFIED="1376422184855" TEXT="cnrl.com &gt; Investor-information &gt; Financial-information &gt; Financial-reports &gt; Annual-report"/>
<node CREATED="1376422218401" ID="ID_1723548987" LINK="http://www.capp.ca/library/publications/crudeOilAndOilSands/pages/pubInfo.aspx?DocId=121342" MODIFIED="1376422218401" TEXT="capp.ca &gt; Library &gt; Publications &gt; CrudeOilAndOilSands &gt; Pages &gt; PubInfo ? ..."/>
<node CREATED="1376436169379" ID="ID_959396131" LINK="http://www.mining.ca/site/index.php/en/towards-sustainable-mining/community-of-interest-advisory-panel.html?fuseaction=media_lib.get&amp;media_id=416" MODIFIED="1376436169379" TEXT="mining.ca &gt; Site &gt; Index.php &gt; En &gt; Towards-sustainable-mining &gt; Community-of-interest-advisory-panel ? ..."/>
</node>
<node CREATED="1375208156658" ID="ID_834332748" MODIFIED="1375208159137" TEXT="Monetary">
<node CREATED="1372871090517" ID="ID_980827825" MODIFIED="1372871108594" TEXT="Fair value">
<node CREATED="1376422184855" ID="ID_648866367" LINK="http://www.cnrl.com/investor-information/financial-information/financial-reports/annual-report.html" MODIFIED="1376422184855" TEXT="cnrl.com &gt; Investor-information &gt; Financial-information &gt; Financial-reports &gt; Annual-report"/>
<node CREATED="1376437538591" ID="ID_111230438" LINK="http://www.cnrl.com/investor-information/financial-information/financial-reports/quarterly-reports.html" MODIFIED="1376437538591" TEXT="cnrl.com &gt; Investor-information &gt; Financial-information &gt; Financial-reports &gt; Quarterly-reports"/>
</node>
<node CREATED="1372806408885" ID="ID_29156471" MODIFIED="1372806411610" TEXT="Low cost">
<node CREATED="1376422184855" ID="ID_243260547" LINK="http://www.cnrl.com/investor-information/financial-information/financial-reports/annual-report.html" MODIFIED="1376422184855" TEXT="cnrl.com &gt; Investor-information &gt; Financial-information &gt; Financial-reports &gt; Annual-report"/>
<node CREATED="1376437538591" ID="ID_1649838772" LINK="http://www.cnrl.com/investor-information/financial-information/financial-reports/quarterly-reports.html" MODIFIED="1376437538591" TEXT="cnrl.com &gt; Investor-information &gt; Financial-information &gt; Financial-reports &gt; Quarterly-reports"/>
</node>
<node CREATED="1375134251574" ID="ID_198380316" MODIFIED="1375134512962" TEXT="Acceptable price">
<node CREATED="1376422184855" ID="ID_1928708362" LINK="http://www.cnrl.com/investor-information/financial-information/financial-reports/annual-report.html" MODIFIED="1376422184855" TEXT="cnrl.com &gt; Investor-information &gt; Financial-information &gt; Financial-reports &gt; Annual-report"/>
</node>
<node CREATED="1375196050250" ID="ID_803442277" MODIFIED="1376439509128" TEXT="Maximize value creation and benefits">
<node CREATED="1376323618590" ID="ID_1859521076" LINK="http://www.mining.ca/site/index.php/en/news-a-media/publications.html" MODIFIED="1376323618590" TEXT="mining.ca &gt; Site &gt; Index.php &gt; En &gt; News-a-media &gt; Publications"/>
<node CREATED="1376422184855" ID="ID_165130339" LINK="http://www.cnrl.com/investor-information/financial-information/financial-reports/annual-report.html" MODIFIED="1376422184855" TEXT="cnrl.com &gt; Investor-information &gt; Financial-information &gt; Financial-reports &gt; Annual-report"/>
<node CREATED="1376422218401" ID="ID_11498124" LINK="http://www.capp.ca/library/publications/crudeOilAndOilSands/pages/pubInfo.aspx?DocId=121342" MODIFIED="1376422218401" TEXT="capp.ca &gt; Library &gt; Publications &gt; CrudeOilAndOilSands &gt; Pages &gt; PubInfo ? ..."/>
<node CREATED="1376436169379" ID="ID_1653823755" LINK="http://www.mining.ca/site/index.php/en/towards-sustainable-mining/community-of-interest-advisory-panel.html?fuseaction=media_lib.get&amp;media_id=416" MODIFIED="1376436169379" TEXT="mining.ca &gt; Site &gt; Index.php &gt; En &gt; Towards-sustainable-mining &gt; Community-of-interest-advisory-panel ? ..."/>
<node CREATED="1376437538591" ID="ID_343213887" LINK="http://www.cnrl.com/investor-information/financial-information/financial-reports/quarterly-reports.html" MODIFIED="1376437538591" TEXT="cnrl.com &gt; Investor-information &gt; Financial-information &gt; Financial-reports &gt; Quarterly-reports"/>
</node>
</node>
</node>
<node CREATED="1375134977145" ID="ID_59942414" MODIFIED="1375134994026" TEXT="Providing benefits to citizens">
<icon BUILTIN="go"/>
<node CREATED="1376323098852" ID="ID_1765249766" MODIFIED="1376440729736" TEXT="Canada benefits">
<node CREATED="1376440267776" ID="ID_448780510" LINK="http://www.mining.ca/site/index.php/en/news-a-media/publications.html" MODIFIED="1376440267776" TEXT="mining.ca &gt; Site &gt; Index.php &gt; En &gt; News-a-media &gt; Publications"/>
<node CREATED="1376422184855" ID="ID_999319797" LINK="http://www.cnrl.com/investor-information/financial-information/financial-reports/annual-report.html" MODIFIED="1376422184855" TEXT="cnrl.com &gt; Investor-information &gt; Financial-information &gt; Financial-reports &gt; Annual-report"/>
<node CREATED="1376437538591" ID="ID_367230634" LINK="http://www.cnrl.com/investor-information/financial-information/financial-reports/quarterly-reports.html" MODIFIED="1376437538591" TEXT="cnrl.com &gt; Investor-information &gt; Financial-information &gt; Financial-reports &gt; Quarterly-reports"/>
</node>
<node CREATED="1372805986241" ID="ID_263793709" MODIFIED="1372805995881" TEXT="Industry and communty benefit">
<node CREATED="1376440267776" ID="ID_1407945884" LINK="http://www.mining.ca/site/index.php/en/news-a-media/publications.html" MODIFIED="1376440267776" TEXT="mining.ca &gt; Site &gt; Index.php &gt; En &gt; News-a-media &gt; Publications"/>
<node CREATED="1376440647785" LINK="http://www.capp.ca/canadaIndustry/oilSands/Dialogue-Resources/US/Pages/default.aspx" MODIFIED="1376440647785" TEXT="capp.ca &gt; CanadaIndustry &gt; OilSands &gt; Dialogue-Resources &gt; US &gt; Pages &gt; Default"/>
</node>
<node CREATED="1372805996337" ID="ID_108463422" MODIFIED="1372806000380" TEXT="Public benefit">
<node CREATED="1376440566435" ID="ID_731071317" LINK="http://www.mining.ca/www/media_lib/MAC_Documents/Publications/2012/CSRAccountabilityReport2012.pdf" MODIFIED="1376440566435" TEXT="mining.ca &gt; Www &gt; Media lib &gt; MAC Documents &gt; Publications &gt; 2012 &gt; CSRAccountabilityReport2012"/>
</node>
<node CREATED="1372868142090" ID="ID_60185211" MODIFIED="1372868177293" TEXT="Generating growth and prosperity">
<node CREATED="1376436315234" LINK="http://www.miningnorth.com/docs/NWT%20Diamonds%202008%20(Final)%20v3.pdf" MODIFIED="1376436315234">
<richcontent TYPE="NODE"><html>
  <head>
    
  </head>
  <body>
    <a href="http://www.miningnorth.com/docs/NWT%20Diamonds%202008%20(Final)%20v3.pdf">http://www.miningnorth.com/docs/NWT%20Diamonds%202008%20(Final)%20v3.pdf</a>
  </body>
</html></richcontent>
</node>
<node CREATED="1376422184855" ID="ID_1800846319" LINK="http://www.cnrl.com/investor-information/financial-information/financial-reports/annual-report.html" MODIFIED="1376422184855" TEXT="cnrl.com &gt; Investor-information &gt; Financial-information &gt; Financial-reports &gt; Annual-report"/>
<node CREATED="1376437538591" ID="ID_1137776944" LINK="http://www.cnrl.com/investor-information/financial-information/financial-reports/quarterly-reports.html" MODIFIED="1376437538591" TEXT="cnrl.com &gt; Investor-information &gt; Financial-information &gt; Financial-reports &gt; Quarterly-reports"/>
</node>
<node CREATED="1375136027846" ID="ID_1662582685" MODIFIED="1375197607580" TEXT="Consideration of health of humans">
<node CREATED="1376319636932" ID="ID_1496531822" LINK="http://www.cnrl.com/investor-information/financial-information/financial-reports/annual-report.html" MODIFIED="1376319636932" TEXT="cnrl.com &gt; Investor-information &gt; Financial-information &gt; Financial-reports &gt; Annual-report"/>
</node>
<node CREATED="1375197589047" ID="ID_1503984395" MODIFIED="1375197602697" TEXT="Consideration of quality of life">
<node CREATED="1376440267776" ID="ID_702201184" LINK="http://www.mining.ca/site/index.php/en/news-a-media/publications.html" MODIFIED="1376440267776" TEXT="mining.ca &gt; Site &gt; Index.php &gt; En &gt; News-a-media &gt; Publications"/>
<node CREATED="1376440356211" LINK="http://www.cnrl.com/corporate-responsibility/stewardship-report.html" MODIFIED="1376440356211" TEXT="cnrl.com &gt; Corporate-responsibility &gt; Stewardship-report"/>
<node CREATED="1376440372674" LINK="http://www.miningnorth.com/docs/NWT%20Diamonds%202008%20" MODIFIED="1376440372674" TEXT="miningnorth.com &gt; Docs &gt; NWT Diamonds 2008 (Final) v3"/>
</node>
</node>
<node CREATED="1375135060883" ID="ID_655688467" MODIFIED="1375135073970" TEXT="Providing benefits to employees">
<icon BUILTIN="go"/>
<node CREATED="1372805971637" ID="ID_475095135" MODIFIED="1372805979136" TEXT="From pension plans">
<node CREATED="1376441636998" ID="ID_78350958" LINK="http://www.capp.ca/canadaIndustry/oilSands/Dialogue-Resources/US/Pages/default.aspx" MODIFIED="1376441636998" TEXT="capp.ca &gt; CanadaIndustry &gt; OilSands &gt; Dialogue-Resources &gt; US &gt; Pages &gt; Default"/>
<node CREATED="1376441648783" ID="ID_1266531353" LINK="http://www.capp.ca/getdoc.aspx?DocId=180076" MODIFIED="1376441648783" TEXT="capp.ca &gt; Getdoc ? ..."/>
<node CREATED="1376422184855" ID="ID_1756450177" LINK="http://www.cnrl.com/investor-information/financial-information/financial-reports/annual-report.html" MODIFIED="1376422184855" TEXT="cnrl.com &gt; Investor-information &gt; Financial-information &gt; Financial-reports &gt; Annual-report"/>
<node CREATED="1376437538591" ID="ID_1343380301" LINK="http://www.cnrl.com/investor-information/financial-information/financial-reports/quarterly-reports.html" MODIFIED="1376437538591" TEXT="cnrl.com &gt; Investor-information &gt; Financial-information &gt; Financial-reports &gt; Quarterly-reports"/>
</node>
<node CREATED="1372806000874" ID="ID_627937619" MODIFIED="1372806006940" TEXT="Employee benefit plan">
<node CREATED="1376422184855" ID="ID_1469935881" LINK="http://www.cnrl.com/investor-information/financial-information/financial-reports/annual-report.html" MODIFIED="1376422184855" TEXT="cnrl.com &gt; Investor-information &gt; Financial-information &gt; Financial-reports &gt; Annual-report"/>
<node CREATED="1376437538591" ID="ID_1856262834" LINK="http://www.cnrl.com/investor-information/financial-information/financial-reports/quarterly-reports.html" MODIFIED="1376437538591" TEXT="cnrl.com &gt; Investor-information &gt; Financial-information &gt; Financial-reports &gt; Quarterly-reports"/>
</node>
<node CREATED="1372868301050" ID="ID_121208697" MODIFIED="1372868307613" TEXT="Protecting health and safety">
<node CREATED="1376318902539" LINK="http://www.mining.ca/www/media_lib/MAC_Documents/Publications/2012/CSRAccountabilityReport2012.pdf" MODIFIED="1376318902539" TEXT="mining.ca &gt; Www &gt; Media lib &gt; MAC Documents &gt; Publications &gt; 2012 &gt; CSRAccountabilityReport2012"/>
<node CREATED="1376319642296" LINK="http://www.cnrl.com/investor-information/financial-information/financial-reports/annual-report.html" MODIFIED="1376319642296" TEXT="cnrl.com &gt; Investor-information &gt; Financial-information &gt; Financial-reports &gt; Annual-report"/>
</node>
</node>
<node CREATED="1375112193250" ID="ID_464493849" MODIFIED="1375112218517" TEXT="Monetary costs of production">
<icon BUILTIN="stop"/>
<node CREATED="1372806349085" ID="ID_1674983691" MODIFIED="1372806371646" TEXT="Transportation costs">
<node CREATED="1376422184855" ID="ID_1173259706" LINK="http://www.cnrl.com/investor-information/financial-information/financial-reports/annual-report.html" MODIFIED="1376422184855" TEXT="cnrl.com &gt; Investor-information &gt; Financial-information &gt; Financial-reports &gt; Annual-report"/>
<node CREATED="1376437538591" ID="ID_248399841" LINK="http://www.cnrl.com/investor-information/financial-information/financial-reports/quarterly-reports.html" MODIFIED="1376437538591" TEXT="cnrl.com &gt; Investor-information &gt; Financial-information &gt; Financial-reports &gt; Quarterly-reports"/>
</node>
<node CREATED="1372806371937" ID="ID_281367490" MODIFIED="1372806384815" TEXT="Production costs, factors of production">
<node CREATED="1376323618590" ID="ID_1048345946" LINK="http://www.mining.ca/site/index.php/en/news-a-media/publications.html" MODIFIED="1376323618590" TEXT="mining.ca &gt; Site &gt; Index.php &gt; En &gt; News-a-media &gt; Publications"/>
<node CREATED="1376422184855" ID="ID_1136453437" LINK="http://www.cnrl.com/investor-information/financial-information/financial-reports/annual-report.html" MODIFIED="1376422184855" TEXT="cnrl.com &gt; Investor-information &gt; Financial-information &gt; Financial-reports &gt; Annual-report"/>
<node CREATED="1376422218401" ID="ID_1922777586" LINK="http://www.capp.ca/library/publications/crudeOilAndOilSands/pages/pubInfo.aspx?DocId=121342" MODIFIED="1376422218401" TEXT="capp.ca &gt; Library &gt; Publications &gt; CrudeOilAndOilSands &gt; Pages &gt; PubInfo ? ..."/>
<node CREATED="1376436169379" ID="ID_344079977" LINK="http://www.mining.ca/site/index.php/en/towards-sustainable-mining/community-of-interest-advisory-panel.html?fuseaction=media_lib.get&amp;media_id=416" MODIFIED="1376436169379" TEXT="mining.ca &gt; Site &gt; Index.php &gt; En &gt; Towards-sustainable-mining &gt; Community-of-interest-advisory-panel ? ..."/>
<node CREATED="1376437538591" ID="ID_562398940" LINK="http://www.cnrl.com/investor-information/financial-information/financial-reports/quarterly-reports.html" MODIFIED="1376437538591" TEXT="cnrl.com &gt; Investor-information &gt; Financial-information &gt; Financial-reports &gt; Quarterly-reports"/>
</node>
<node CREATED="1372806385672" ID="ID_15217897" MODIFIED="1372806398283" TEXT="Develop and marketing costs">
<node CREATED="1376422184855" ID="ID_624491996" LINK="http://www.cnrl.com/investor-information/financial-information/financial-reports/annual-report.html" MODIFIED="1376422184855" TEXT="cnrl.com &gt; Investor-information &gt; Financial-information &gt; Financial-reports &gt; Annual-report"/>
<node CREATED="1376437538591" ID="ID_1222537959" LINK="http://www.cnrl.com/investor-information/financial-information/financial-reports/quarterly-reports.html" MODIFIED="1376437538591" TEXT="cnrl.com &gt; Investor-information &gt; Financial-information &gt; Financial-reports &gt; Quarterly-reports"/>
</node>
</node>
<node CREATED="1375195227113" ID="ID_1778422003" MODIFIED="1375198177536" TEXT="Negative health impacts">
<icon BUILTIN="stop"/>
<node CREATED="1375208537310" ID="ID_808631272" MODIFIED="1375208541839" TEXT="Environment">
<node CREATED="1372871298906" ID="ID_1428435890" MODIFIED="1372871304933" TEXT="Tailings and mines waste">
<node CREATED="1376322917188" LINK="http://www.mining.ca/site/index.php/en/news-a-media/publications.html" MODIFIED="1376322917188" TEXT="mining.ca &gt; Site &gt; Index.php &gt; En &gt; News-a-media &gt; Publications"/>
</node>
<node CREATED="1372871305234" ID="ID_341359596" MODIFIED="1376443179436" TEXT="Waste rock">
<node CREATED="1376443158380" ID="ID_1361818296" LINK="http://www.mining.ca/site/index.php/en/news-a-media/publications.html" MODIFIED="1376443158380" TEXT="mining.ca &gt; Site &gt; Index.php &gt; En &gt; News-a-media &gt; Publications"/>
<node CREATED="1376443180016" ID="ID_658982266" LINK="http://www.mining.ca/site/index.php/en/towards-sustainable-mining/community-of-interest-advisory-panel.html?fuseaction=media_lib.get&amp;media_id=416" MODIFIED="1376443180016" TEXT="mining.ca &gt; Site &gt; Index.php &gt; En &gt; Towards-sustainable-mining &gt; Community-of-interest-advisory-panel ? ..."/>
</node>
<node CREATED="1372871309961" ID="ID_946439292" MODIFIED="1375199132746" TEXT="Water waste">
<node CREATED="1376443158380" ID="ID_1129997778" LINK="http://www.mining.ca/site/index.php/en/news-a-media/publications.html" MODIFIED="1376443158380" TEXT="mining.ca &gt; Site &gt; Index.php &gt; En &gt; News-a-media &gt; Publications"/>
<node CREATED="1376441648783" ID="ID_1403034210" LINK="http://www.capp.ca/getdoc.aspx?DocId=180076" MODIFIED="1376441648783" TEXT="capp.ca &gt; Getdoc ? ..."/>
<node CREATED="1376437538591" ID="ID_1549996433" LINK="http://www.cnrl.com/investor-information/financial-information/financial-reports/quarterly-reports.html" MODIFIED="1376437538591" TEXT="cnrl.com &gt; Investor-information &gt; Financial-information &gt; Financial-reports &gt; Quarterly-reports"/>
<node CREATED="1376422184855" ID="ID_295865278" LINK="http://www.cnrl.com/investor-information/financial-information/financial-reports/annual-report.html" MODIFIED="1376422184855" TEXT="cnrl.com &gt; Investor-information &gt; Financial-information &gt; Financial-reports &gt; Annual-report"/>
</node>
<node CREATED="1375114657011" ID="ID_1360949827" MODIFIED="1375135420780" TEXT="Footprint">
<node CREATED="1375114663333" ID="ID_1774473493" MODIFIED="1375114676659" TEXT="Carbon footprint">
<node CREATED="1376443158380" ID="ID_1602177259" LINK="http://www.mining.ca/site/index.php/en/news-a-media/publications.html" MODIFIED="1376443158380" TEXT="mining.ca &gt; Site &gt; Index.php &gt; En &gt; News-a-media &gt; Publications"/>
</node>
<node CREATED="1375114676963" ID="ID_1815579328" MODIFIED="1375114684746" TEXT="GHG footprint">
<node CREATED="1376437538591" ID="ID_1227774535" LINK="http://www.cnrl.com/investor-information/financial-information/financial-reports/quarterly-reports.html" MODIFIED="1376437538591" TEXT="cnrl.com &gt; Investor-information &gt; Financial-information &gt; Financial-reports &gt; Quarterly-reports"/>
<node CREATED="1376422184855" ID="ID_871383270" LINK="http://www.cnrl.com/investor-information/financial-information/financial-reports/annual-report.html" MODIFIED="1376422184855" TEXT="cnrl.com &gt; Investor-information &gt; Financial-information &gt; Financial-reports &gt; Annual-report"/>
</node>
<node CREATED="1375114685033" ID="ID_1624139100" MODIFIED="1375114692860" TEXT="Environmental footprint">
<node CREATED="1376443158380" ID="ID_1612286335" LINK="http://www.mining.ca/site/index.php/en/news-a-media/publications.html" MODIFIED="1376443158380" TEXT="mining.ca &gt; Site &gt; Index.php &gt; En &gt; News-a-media &gt; Publications"/>
</node>
<node CREATED="1375114741741" ID="ID_878415301" MODIFIED="1376443532172" TEXT="Mining footprint">
<node CREATED="1376443511374" LINK="http://www.capp.ca/canadaIndustry/oilSands/Dialogue-Resources/US/Pages/default.aspx" MODIFIED="1376443511374" TEXT="capp.ca &gt; CanadaIndustry &gt; OilSands &gt; Dialogue-Resources &gt; US &gt; Pages &gt; Default"/>
<node CREATED="1376443532621" LINK="http://www.capp.ca/getdoc.aspx?DocId=180076" MODIFIED="1376443532621" TEXT="capp.ca &gt; Getdoc ? ..."/>
</node>
</node>
</node>
<node CREATED="1375208542103" ID="ID_1651236305" MODIFIED="1375208543147" TEXT="Human">
<node CREATED="1375198158981" ID="ID_1009233906" MODIFIED="1375198182733" TEXT="Risk to humans">
<node CREATED="1376319626766" ID="ID_2048675" LINK="http://www.cnrl.com/investor-information/financial-information/financial-reports/annual-report.html" MODIFIED="1376319626766" TEXT="cnrl.com &gt; Investor-information &gt; Financial-information &gt; Financial-reports &gt; Annual-report"/>
</node>
<node CREATED="1375198188142" ID="ID_21271054" MODIFIED="1375198193557" TEXT="Safety risk">
<node CREATED="1376319391909" ID="ID_1726562928" LINK="http://www.mining.ca/site/index.php/en/news-a-media/publications.html" MODIFIED="1376319391909" TEXT="mining.ca &gt; Site &gt; Index.php &gt; En &gt; News-a-media &gt; Publications">
<node CREATED="1376319644908" LINK="http://www.cnrl.com/investor-information/financial-information/financial-reports/annual-report.html" MODIFIED="1376319644908" TEXT="cnrl.com &gt; Investor-information &gt; Financial-information &gt; Financial-reports &gt; Annual-report"/>
</node>
</node>
</node>
</node>
<node CREATED="1375198120540" ID="ID_869235774" MODIFIED="1375198132685" TEXT="Conflict">
<icon BUILTIN="stop"/>
<node CREATED="1372423328557" ID="ID_988030825" MODIFIED="1372423600124" TEXT="With First Nations">
<node CREATED="1376443697873" ID="ID_1506463365" LINK="http://www.mining.ca/www/media_lib/MAC_Documents/Publications/2012/CSRAccountabilityReport2012.pdf" MODIFIED="1376443697873" TEXT="mining.ca &gt; Www &gt; Media lib &gt; MAC Documents &gt; Publications &gt; 2012 &gt; CSRAccountabilityReport2012"/>
</node>
<node CREATED="1372423339857" ID="ID_1339147500" MODIFIED="1372423589537" TEXT="With social and environmental groups">
<node CREATED="1376443805732" ID="ID_84528099" LINK="http://www.mining.ca/site/index.php/en/towards-sustainable-mining/community-of-interest-advisory-panel.html?fuseaction=media_lib.get&amp;media_id=416" MODIFIED="1376443805732" TEXT="mining.ca &gt; Site &gt; Index.php &gt; En &gt; Towards-sustainable-mining &gt; Community-of-interest-advisory-panel ? ..."/>
</node>
<node CREATED="1372423356051" ID="ID_1257359762" MODIFIED="1372423491551" TEXT="With land owners">
<node CREATED="1376437538591" ID="ID_1315739092" LINK="http://www.cnrl.com/investor-information/financial-information/financial-reports/quarterly-reports.html" MODIFIED="1376437538591" TEXT="cnrl.com &gt; Investor-information &gt; Financial-information &gt; Financial-reports &gt; Quarterly-reports"/>
<node CREATED="1376422184855" ID="ID_185724846" LINK="http://www.cnrl.com/investor-information/financial-information/financial-reports/annual-report.html" MODIFIED="1376422184855" TEXT="cnrl.com &gt; Investor-information &gt; Financial-information &gt; Financial-reports &gt; Annual-report"/>
</node>
</node>
<node CREATED="1375198610838" ID="ID_1188237183" MODIFIED="1375198638576" TEXT="Still needed">
<icon BUILTIN="stop"/>
<node CREATED="1372868929494" ID="ID_629375368" MODIFIED="1376442999478" TEXT="Skills development">
<node CREATED="1376444124890" ID="ID_923013406" MODIFIED="1376444144677" TEXT="Only in MAC Annual Report">
<node CREATED="1376443158380" ID="ID_373185377" LINK="http://www.mining.ca/site/index.php/en/news-a-media/publications.html" MODIFIED="1376443158380" TEXT="mining.ca &gt; Site &gt; Index.php &gt; En &gt; News-a-media &gt; Publications"/>
</node>
</node>
</node>
<node CREATED="1372798404141" ID="ID_876455879" MODIFIED="1375116825854" TEXT="Risk">
<icon BUILTIN="stop"/>
<node CREATED="1372869989088" ID="ID_1343914311" MODIFIED="1372870004743" TEXT="Species and environmental risk">
<node CREATED="1376322909369" LINK="http://www.mining.ca/site/index.php/en/news-a-media/publications.html" MODIFIED="1376322909369" TEXT="mining.ca &gt; Site &gt; Index.php &gt; En &gt; News-a-media &gt; Publications"/>
<node CREATED="1376323307625" LINK="http://www.mining.ca/www/media_lib/MAC_Documents/Publications/2012/CSRAccountabilityReport2012.pdf" MODIFIED="1376323307625" TEXT="mining.ca &gt; Www &gt; Media lib &gt; MAC Documents &gt; Publications &gt; 2012 &gt; CSRAccountabilityReport2012"/>
<node CREATED="1376444618614" LINK="http://www.mining.ca/www/media_lib/MAC_Documents/Publications/2012/CSRAccountabilityReport2012.pdf" MODIFIED="1376444618614" TEXT="mining.ca &gt; Www &gt; Media lib &gt; MAC Documents &gt; Publications &gt; 2012 &gt; CSRAccountabilityReport2012"/>
<node CREATED="1376422184855" ID="ID_313318415" LINK="http://www.cnrl.com/investor-information/financial-information/financial-reports/annual-report.html" MODIFIED="1376422184855" TEXT="cnrl.com &gt; Investor-information &gt; Financial-information &gt; Financial-reports &gt; Annual-report"/>
</node>
<node CREATED="1372870023823" ID="ID_83936244" MODIFIED="1372870029804" TEXT="Price risk">
<node CREATED="1372870045286" ID="ID_1691214946" MODIFIED="1372870059973" TEXT="risk of volatility in commodity price">
<node CREATED="1376444769741" LINK="http://www.capp.ca/library/publications/crudeOilAndOilSands/pages/pubInfo.aspx?DocId=121342" MODIFIED="1376444769741" TEXT="capp.ca &gt; Library &gt; Publications &gt; CrudeOilAndOilSands &gt; Pages &gt; PubInfo ? ..."/>
<node CREATED="1376422184855" ID="ID_1016821136" LINK="http://www.cnrl.com/investor-information/financial-information/financial-reports/annual-report.html" MODIFIED="1376422184855" TEXT="cnrl.com &gt; Investor-information &gt; Financial-information &gt; Financial-reports &gt; Annual-report"/>
</node>
</node>
<node CREATED="1372870030056" ID="ID_1058250881" MODIFIED="1372870041586" TEXT="Economic risk">
<node CREATED="1376444644988" LINK="http://www.mining.ca/www/media_lib/MAC_Documents/Publications/2012/CSRAccountabilityReport2012.pdf" MODIFIED="1376444644988" TEXT="mining.ca &gt; Www &gt; Media lib &gt; MAC Documents &gt; Publications &gt; 2012 &gt; CSRAccountabilityReport2012"/>
<node CREATED="1376422184855" ID="ID_1427326781" LINK="http://www.cnrl.com/investor-information/financial-information/financial-reports/annual-report.html" MODIFIED="1376422184855" TEXT="cnrl.com &gt; Investor-information &gt; Financial-information &gt; Financial-reports &gt; Annual-report"/>
</node>
</node>
</node>
</node>
</map>
